# Supplementary material for: Synthesis and Structure–Activity Relationship Studies of Pyrido [1,2-e]Purine-2,4(1H,3H)-Dione Derivatives Targeting Flavin-Dependent Thymidylate Synthase in Mycobacterium tuberculosis
Source: MDPI journal article supplement (doi:10.3390/molecules27196216), 2022-09-21

# Synthesis and structure–activity relationship studies of pyrido[1,2-*e*]purine-2,4(1*H*,3*H*)-dione derivatives targeting *flavin-dependent thymidylate synthase* in *Mycobacterium tuberculosis*

Nicolas G. Biteau,<sup>1</sup> Vincent Roy,<sup>1,\*</sup> Cyril Nicolas,<sup>1</sup> Hubert F. Becker,<sup>2,3</sup> Jean-Christophe Lambry,<sup>2</sup> Hannu Myllykallio,<sup>2</sup> and Luigi A. Agrofoglio<sup>1,\*</sup>

<sup>1</sup> Institute of Organic and Analytical Chemistry, CNRS UMR 7311, Université d'Orléans, Rue de Chartres, 45067 Orleans CEDEX 2, France

<sup>2</sup> Laboratory of Optics and Biosciences, INSERM U 696-CNRS UMR 7645, Ecole Polytechnique, Route de Saclay, 91128 Palaiseau Cedex (France)

<sup>3</sup> Sorbonne Université, Faculté des Sciences et Ingénierie, 75005 Paris, France

Corresponding authors : vincent.roy@univ-orleans.fr; luigi.agrofoglio@univ-orleans.fr

## Supplementary Informations

Copies of <sup>1</sup>H-, <sup>13</sup>C- and <sup>1</sup>H-<sup>13</sup>C HMBC NMR spectra of representative molecules

- ✓ NMR analysis of representative compounds from isocyanate cyclisation compounds (**9c**, **9e**, **9g-j**, **10b-d**)
- ✓ For the series **13**, **18**, **19**, **20** and **21**, we present copies of <sup>1</sup>H-, <sup>13</sup>C-NMR spectra of representative molecules which exhibit Mtb Thy X inhibition > 35%

<sup>1</sup>H NMR (DMSO-d<sub>6</sub>) of compound **9c**

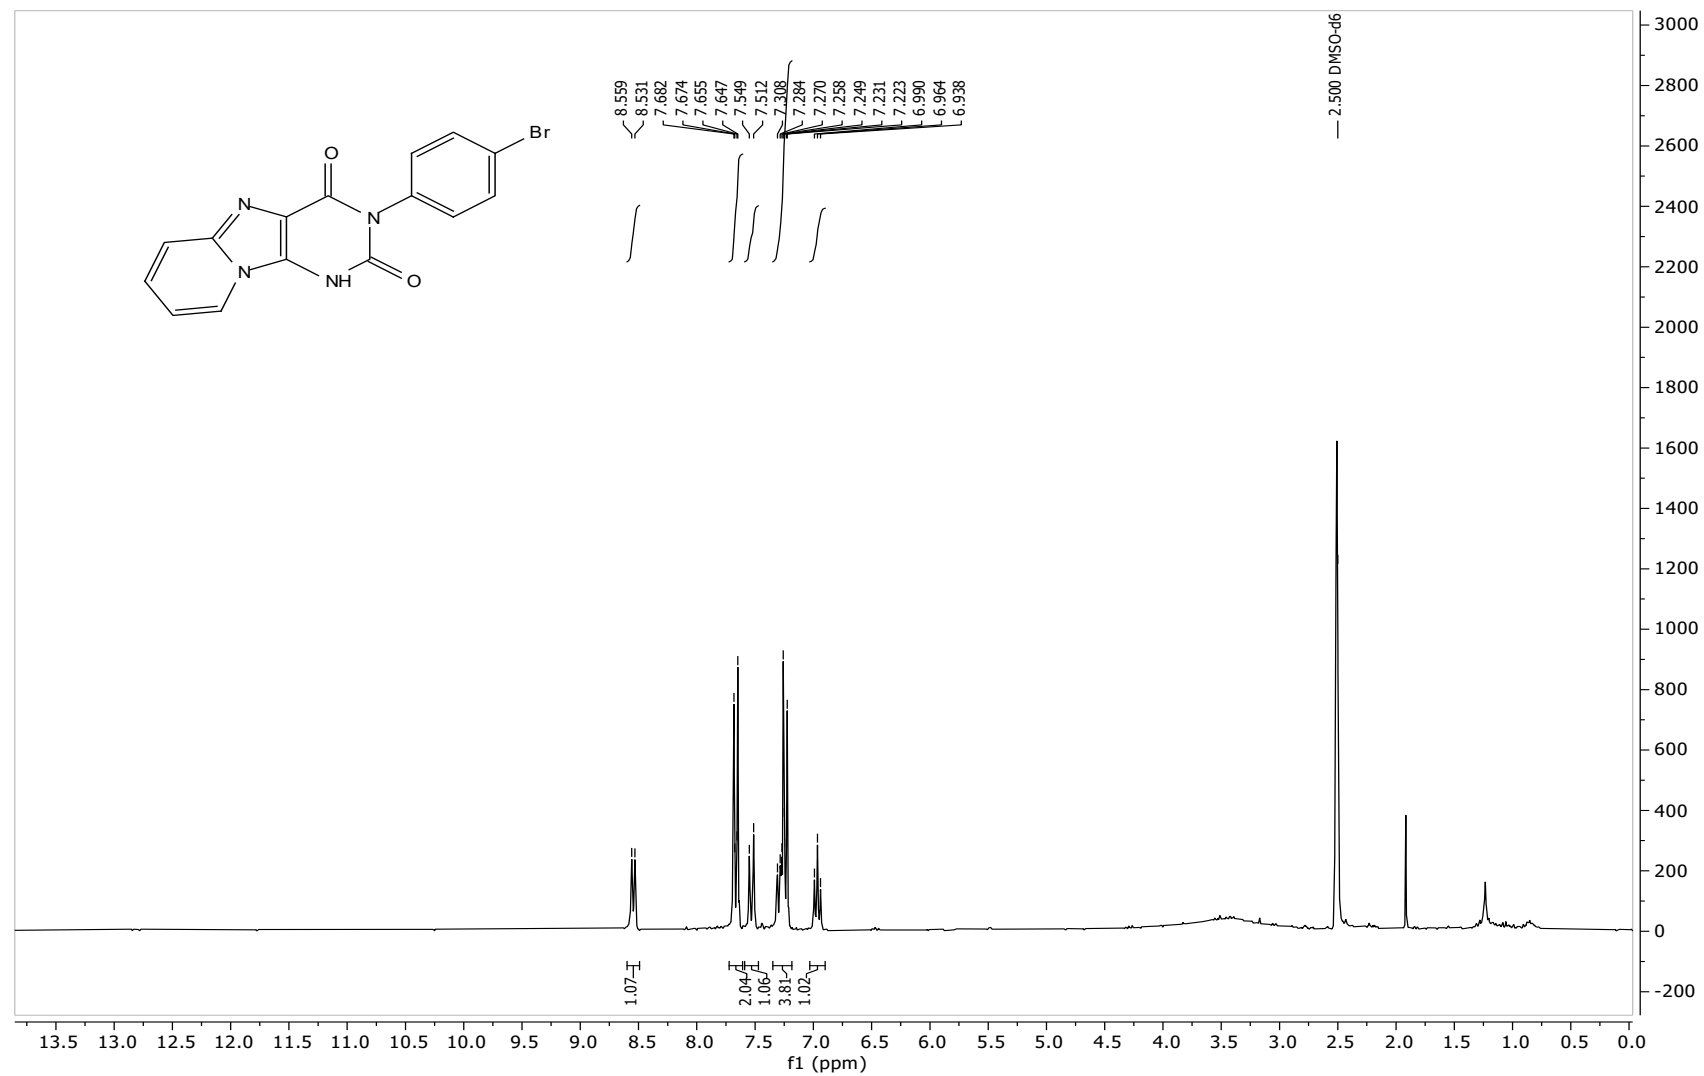

$^{13}\text{C}$  NMR (DMSO- $d_6$ ) of compound **9c**

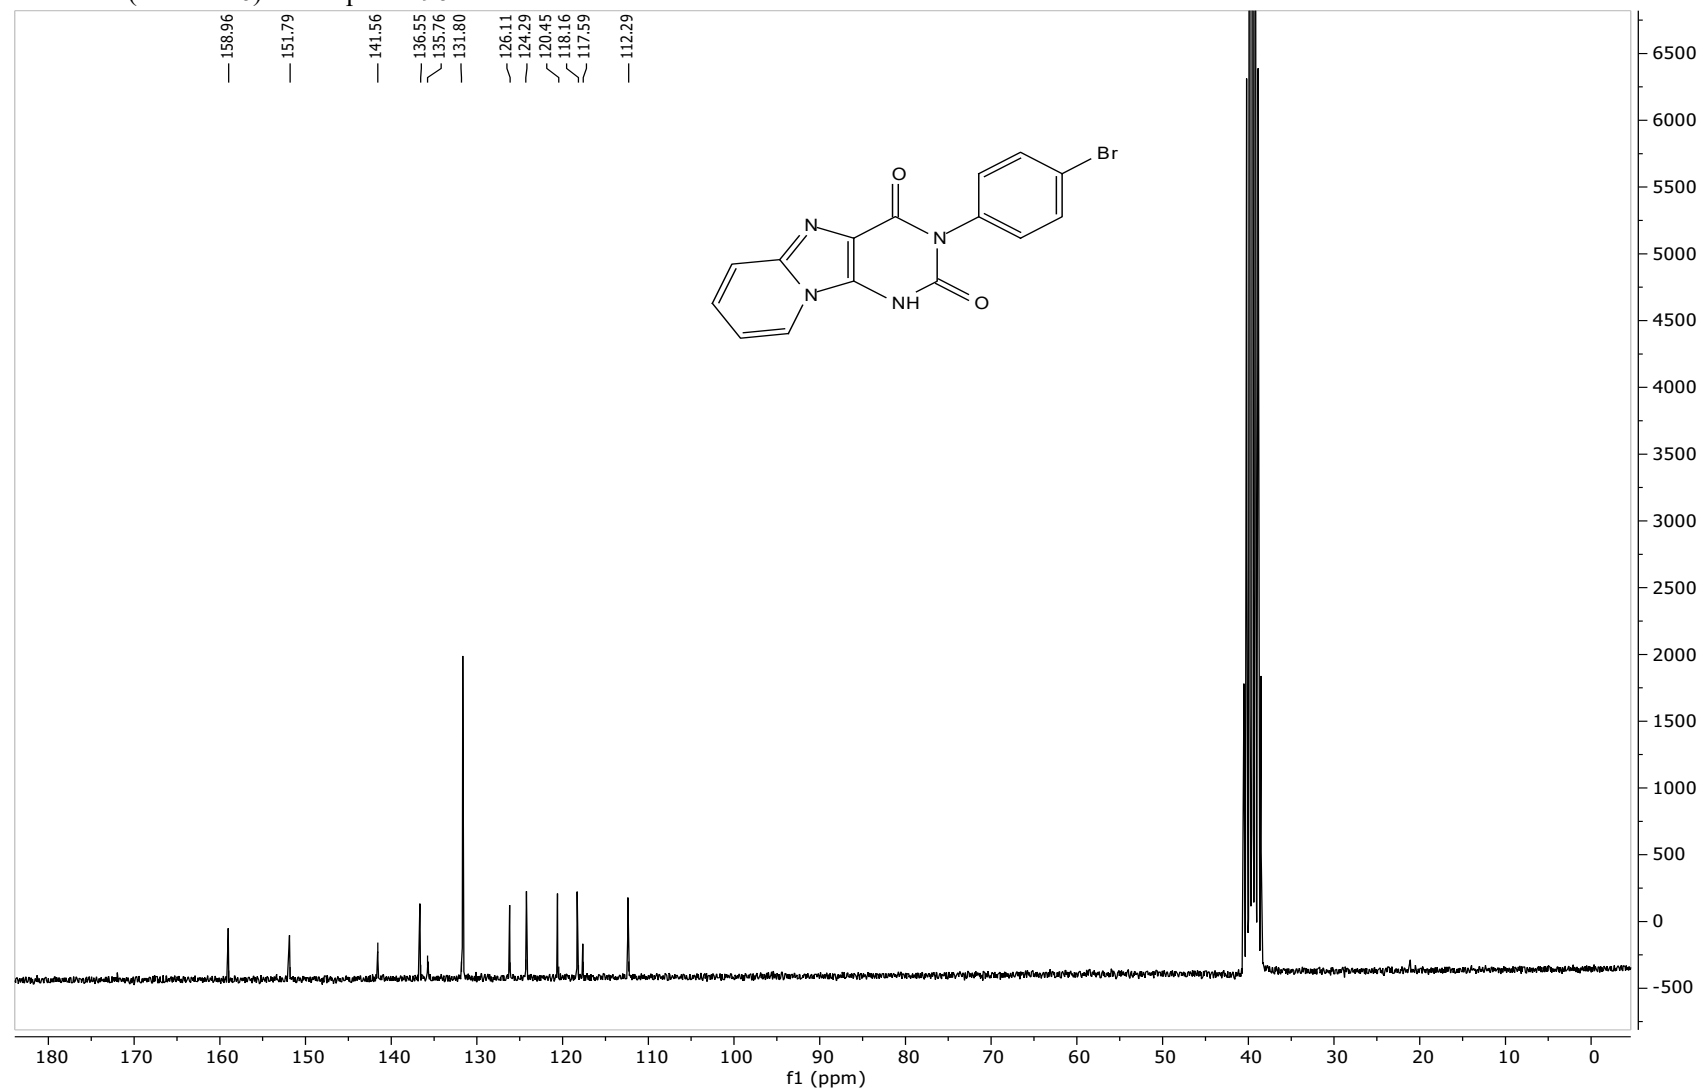

<sup>1</sup>H NMR (DMSO-d<sub>6</sub>) spectra of compound **9e**

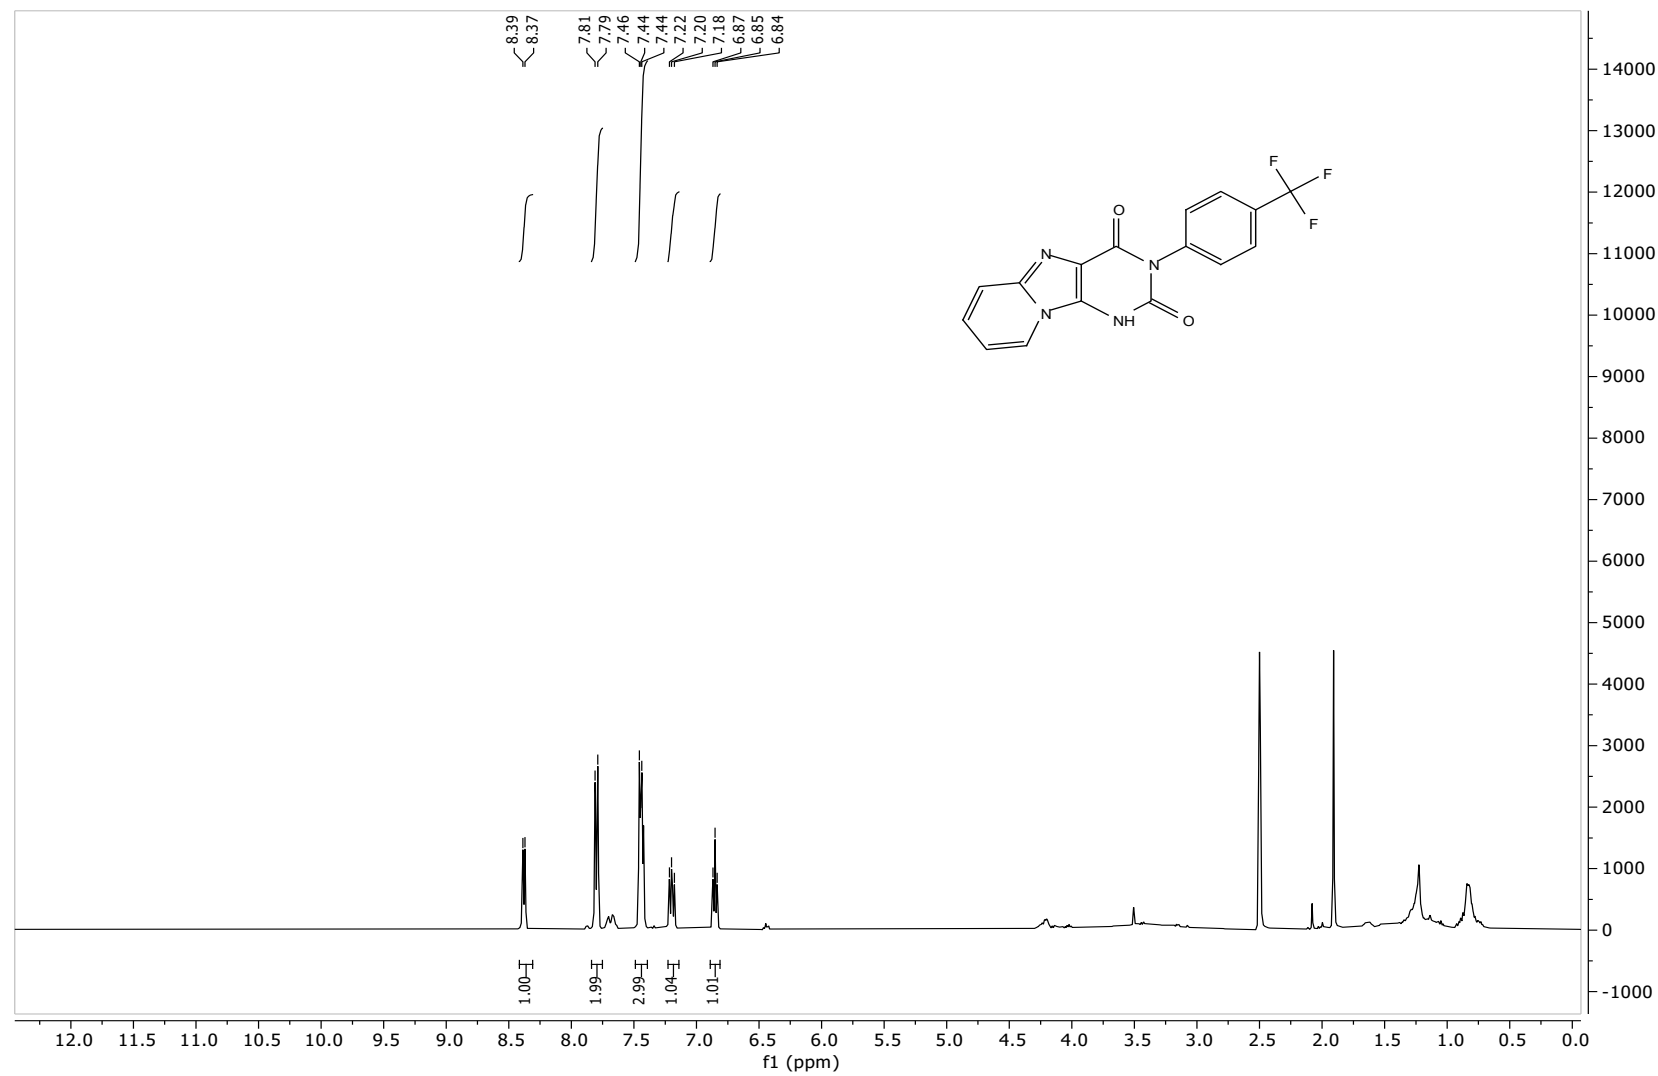

$^{13}\text{C}$  NMR (DMSO- $d_6$ ) spectra of compound **9e**

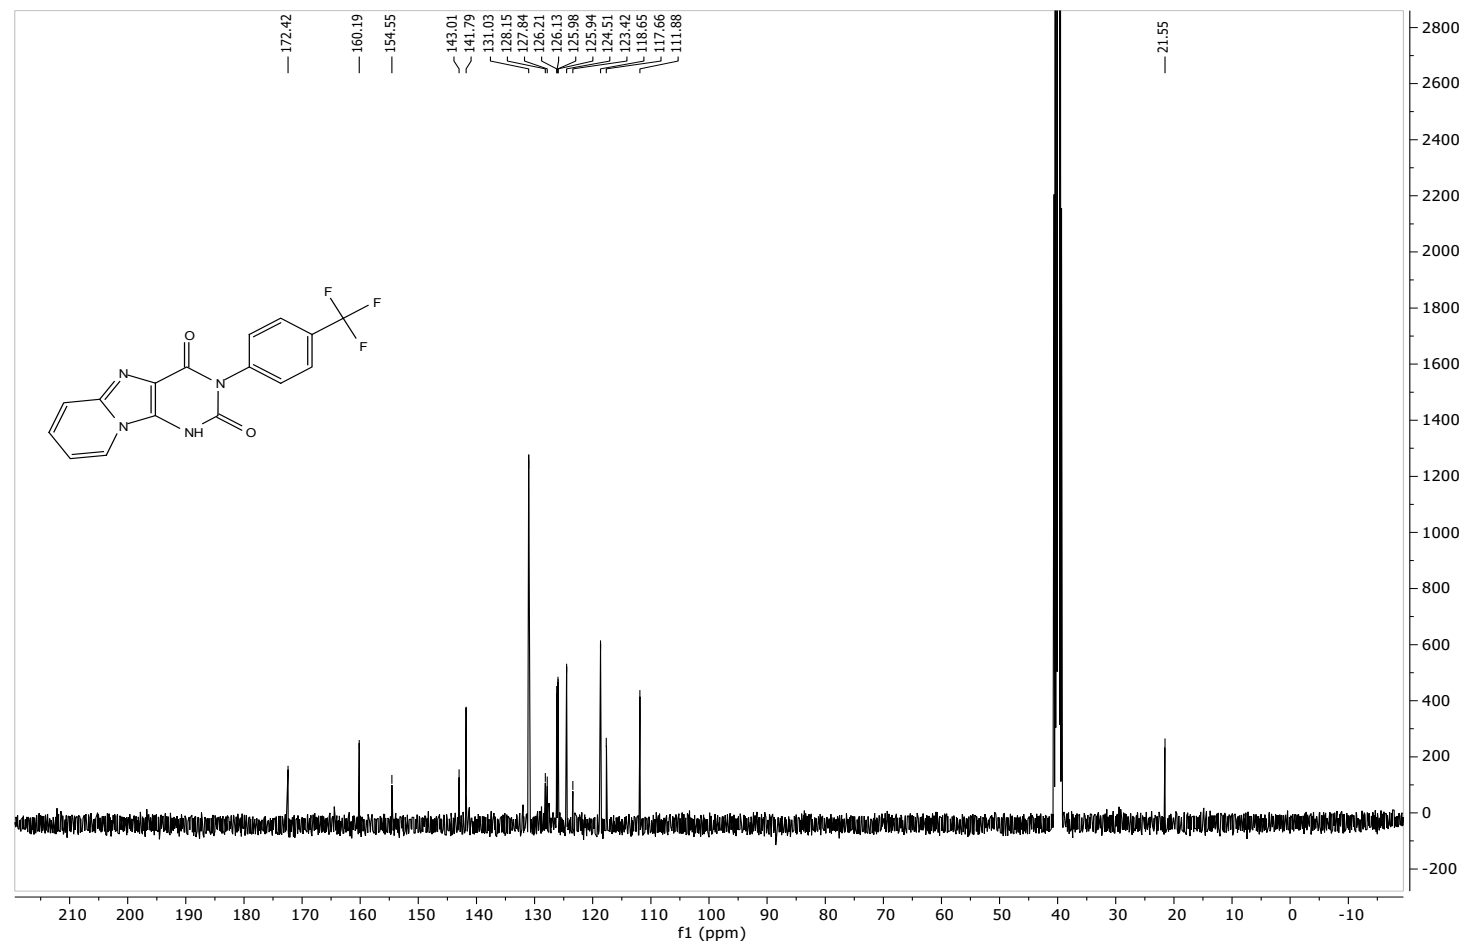

<sup>1</sup>H NMR (DMSO-d<sub>6</sub>) spectra of compound **9g**

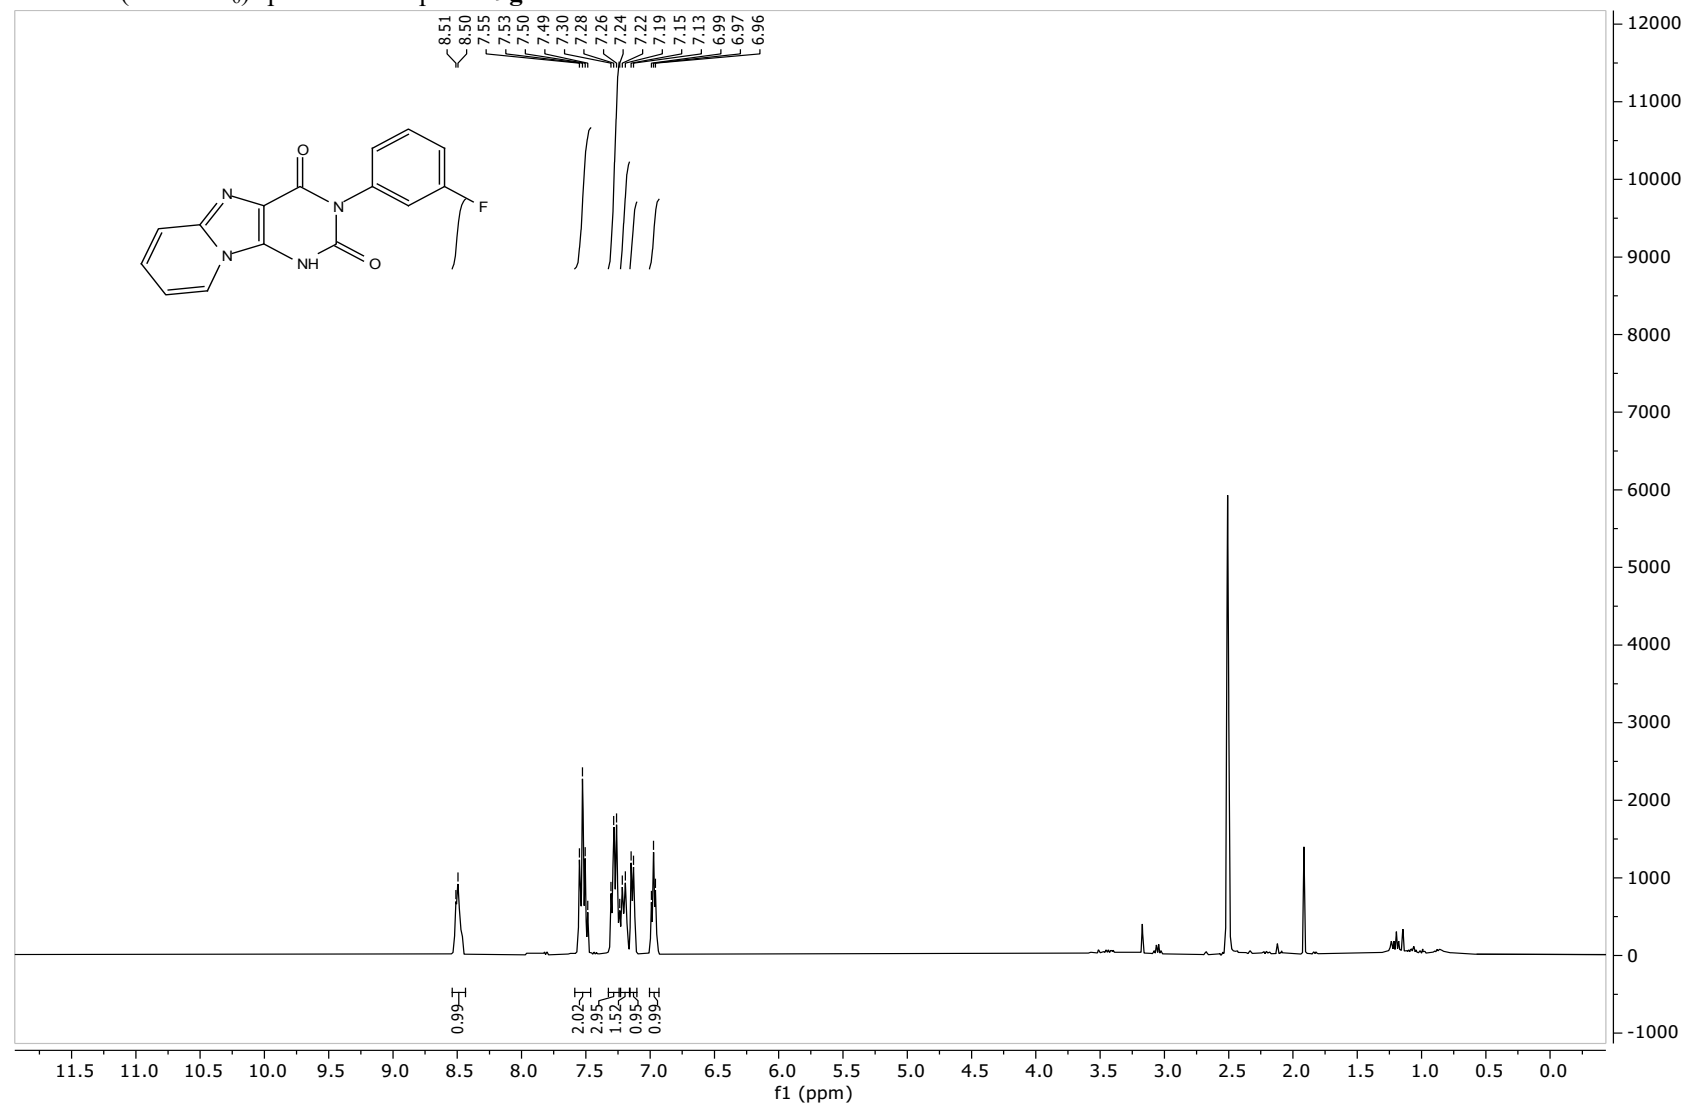

$^{13}\text{C}$  NMR (DMSO- $d_6$ ) spectra of compound **9g**

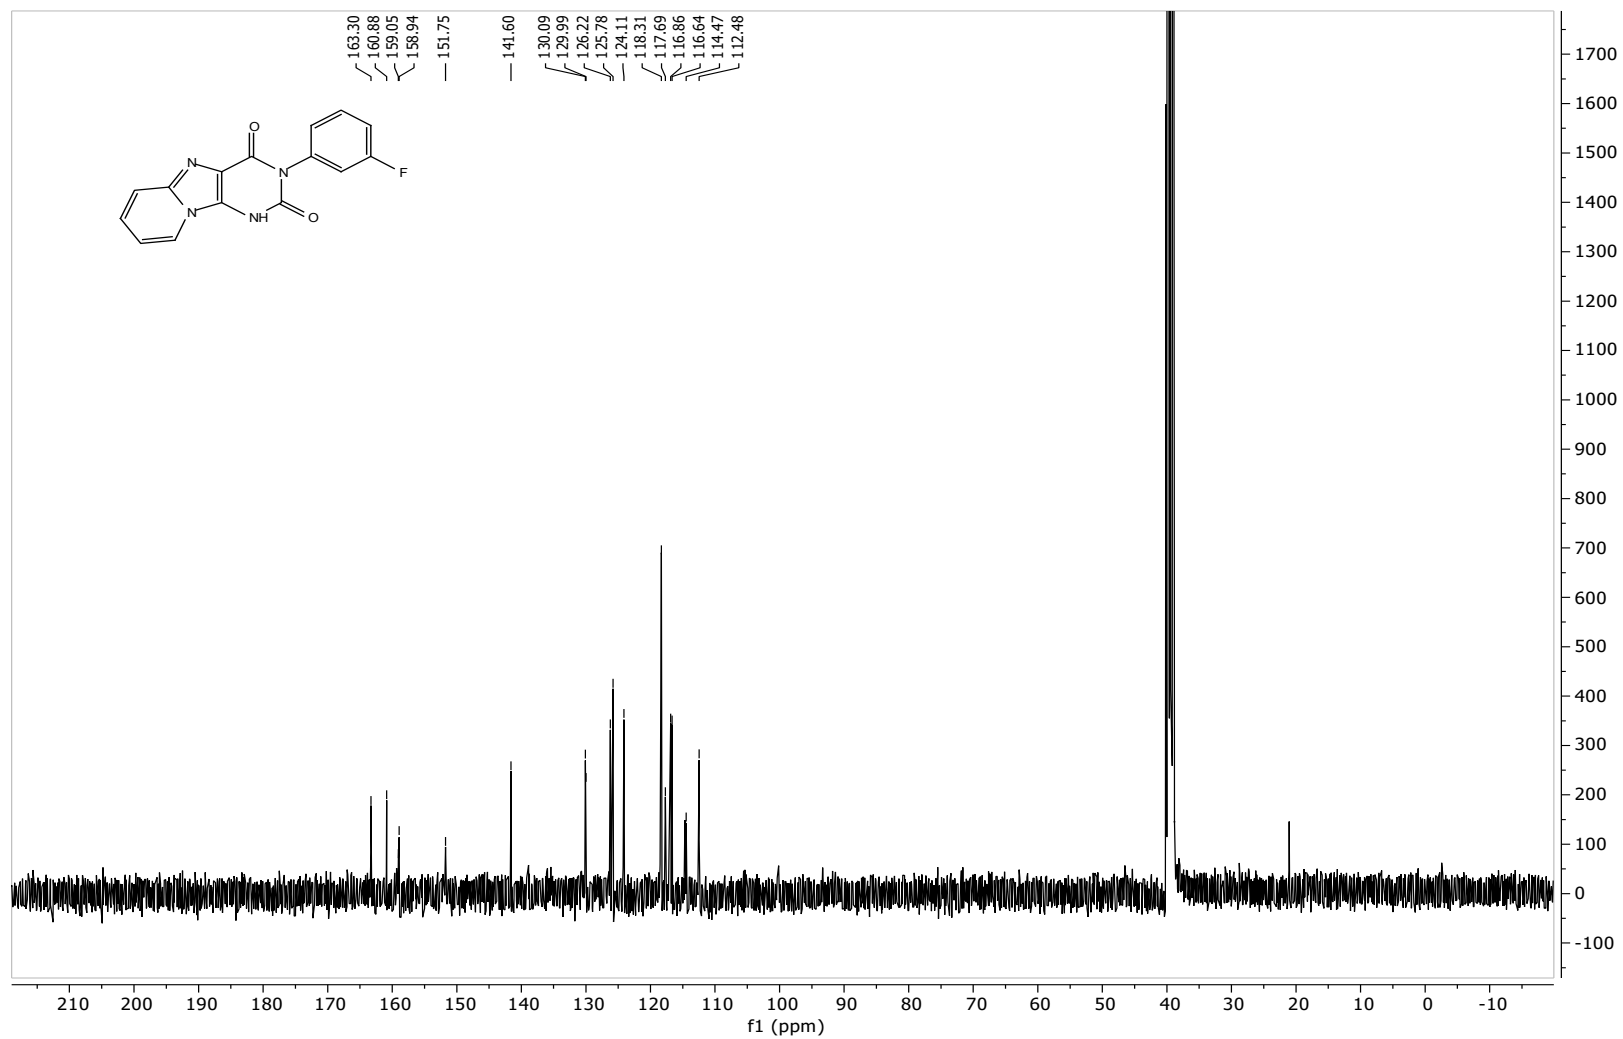

<sup>1</sup>H NMR (DMSO-d<sub>6</sub>) spectra of compound **9h**

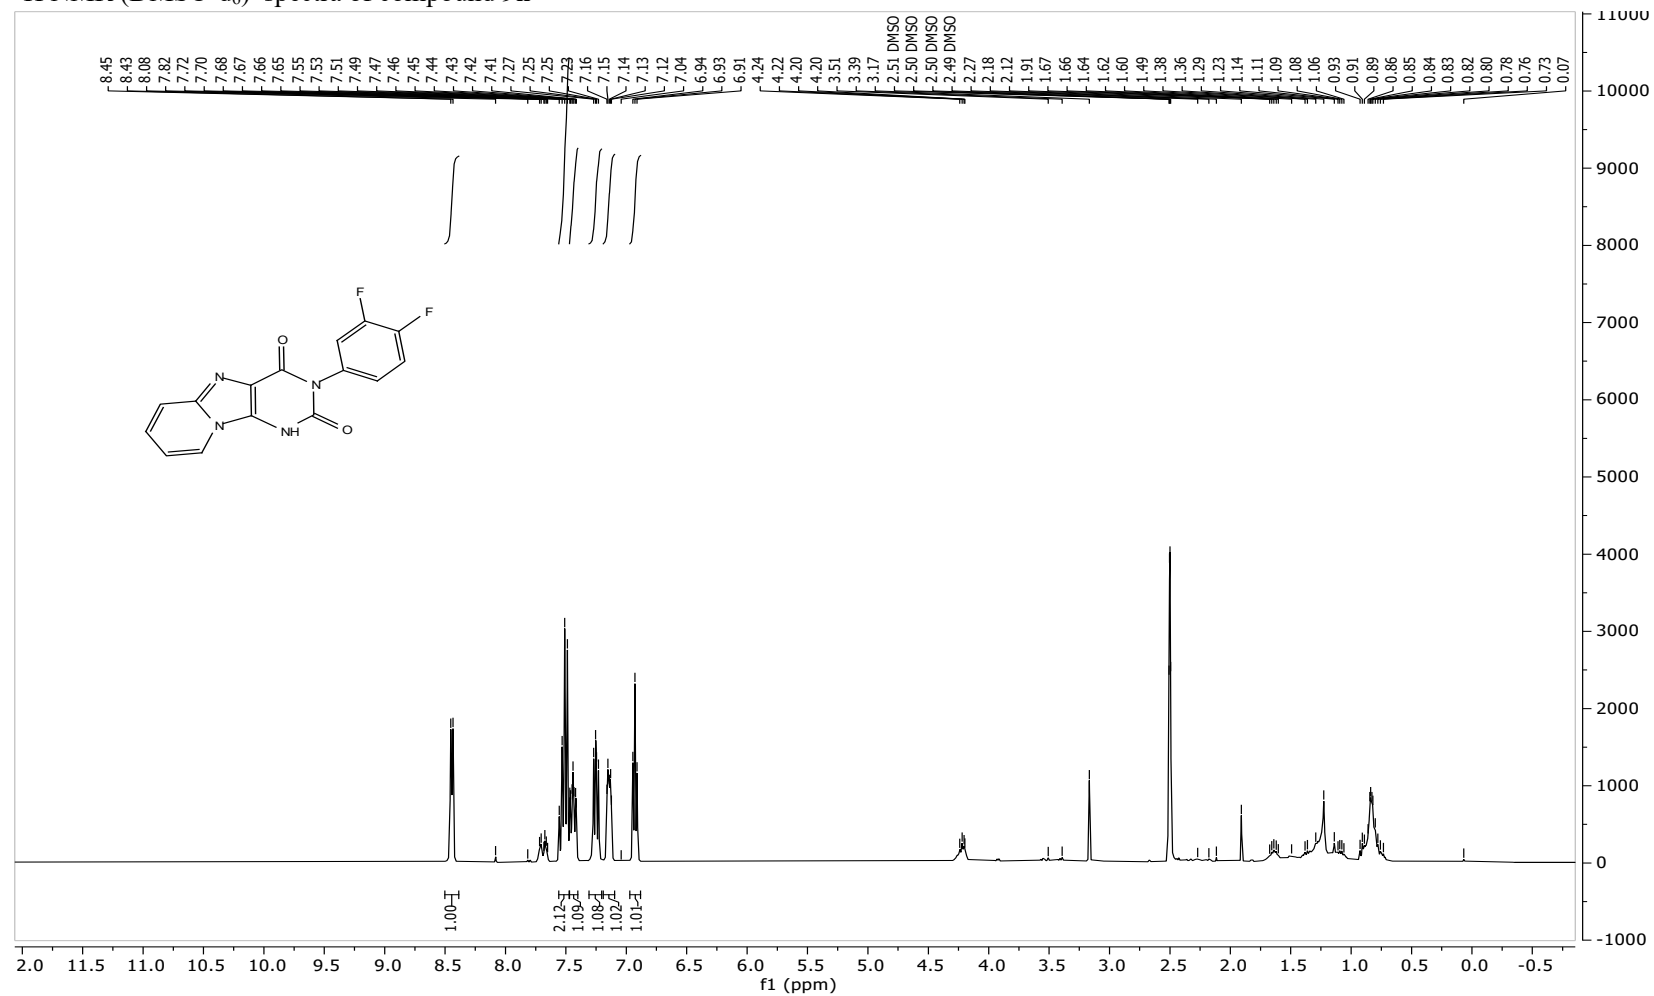



$^{13}\text{C}$  NMR (DMSO- $d_6$ ) spectra of compound **9h**

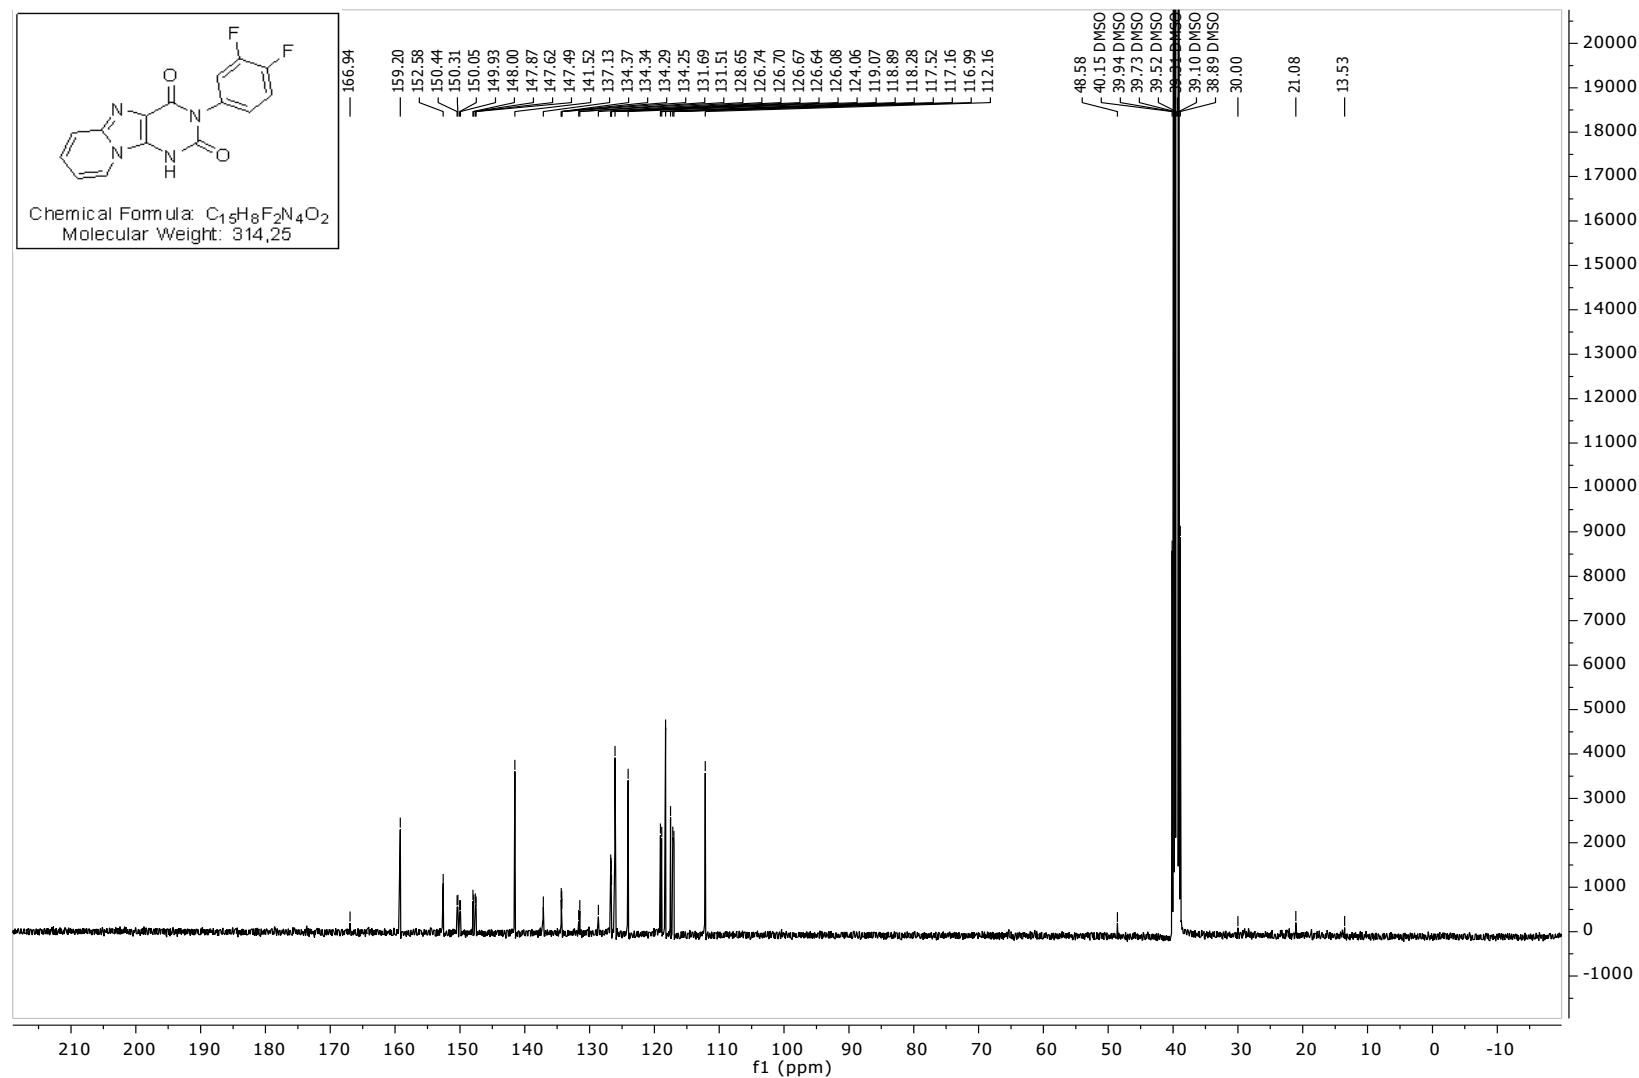

$^1\text{H}$  and (DMSO- $d_6$ ) spectra of compound **9i**

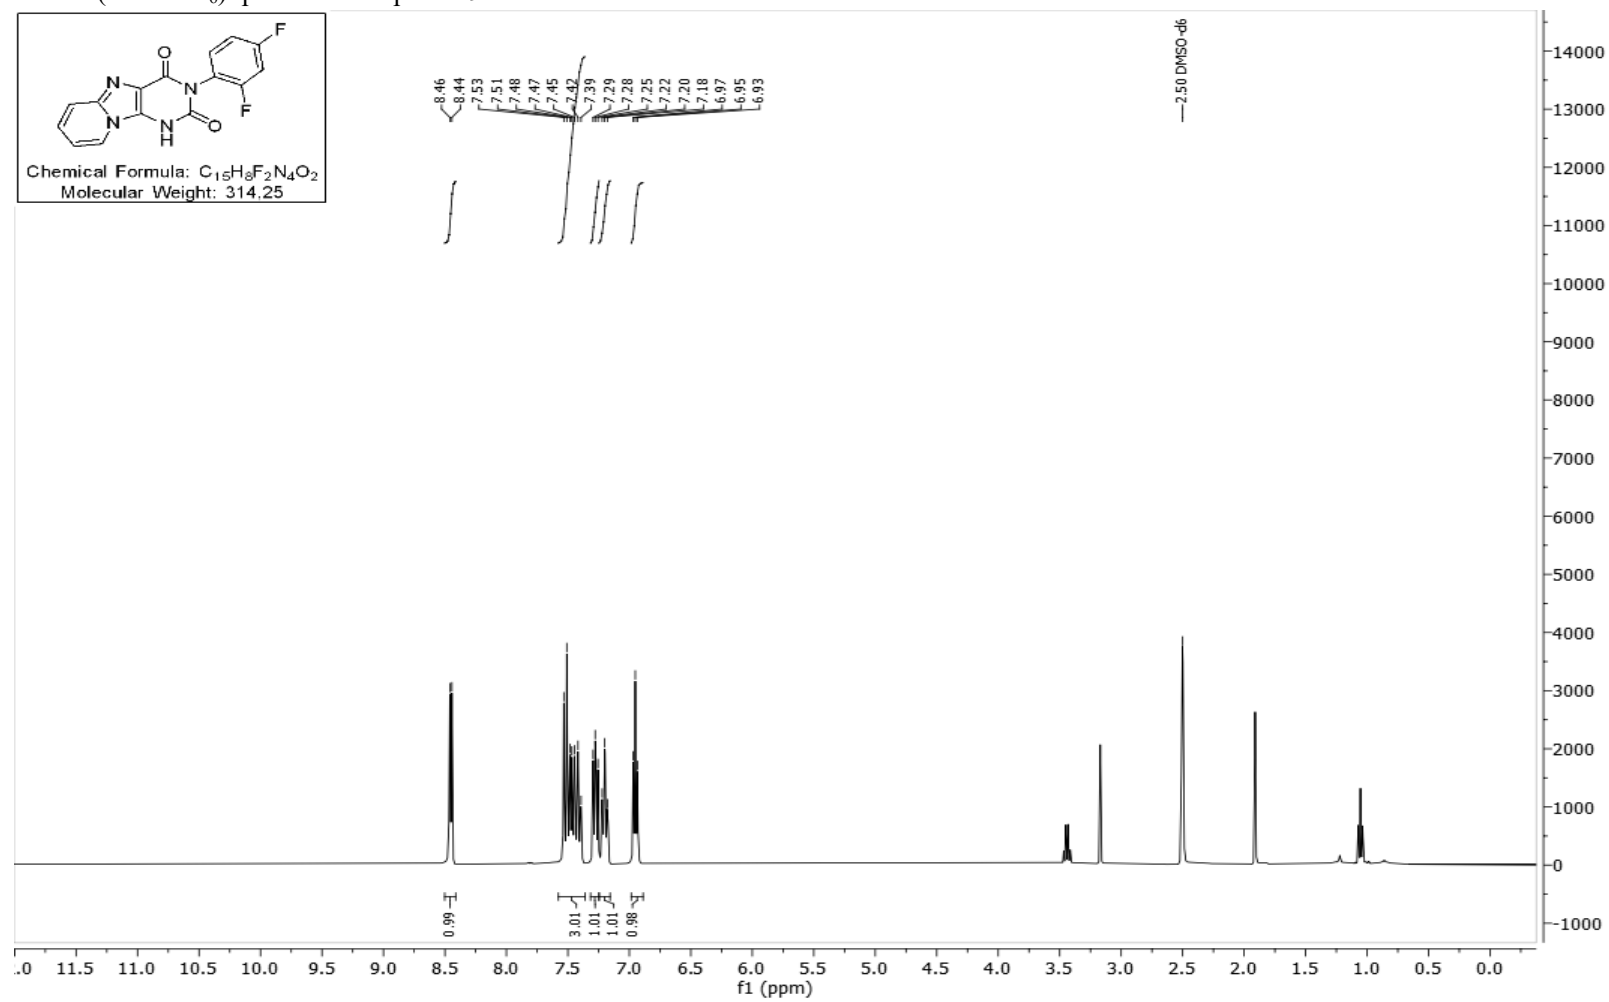

$^{13}\text{C}$  NMR (DMSO- $d_6$ ) of compound **9i**

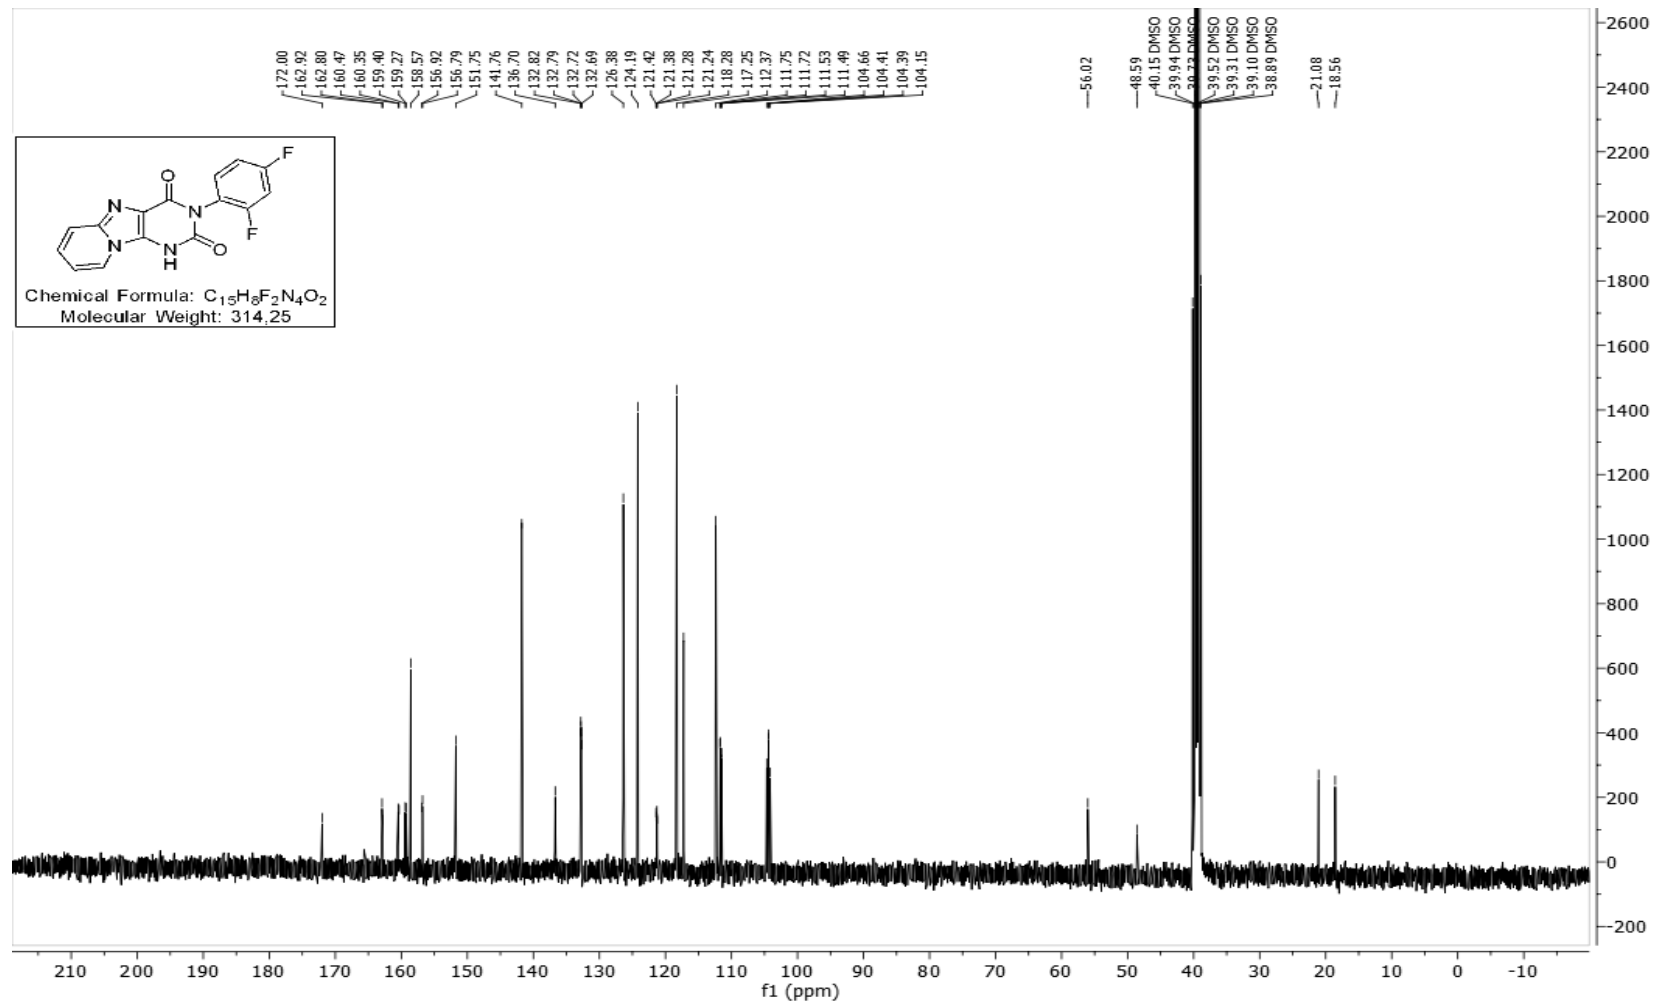

<sup>1</sup>H NMR (DMSO-d<sub>6</sub>) of compound **9j**

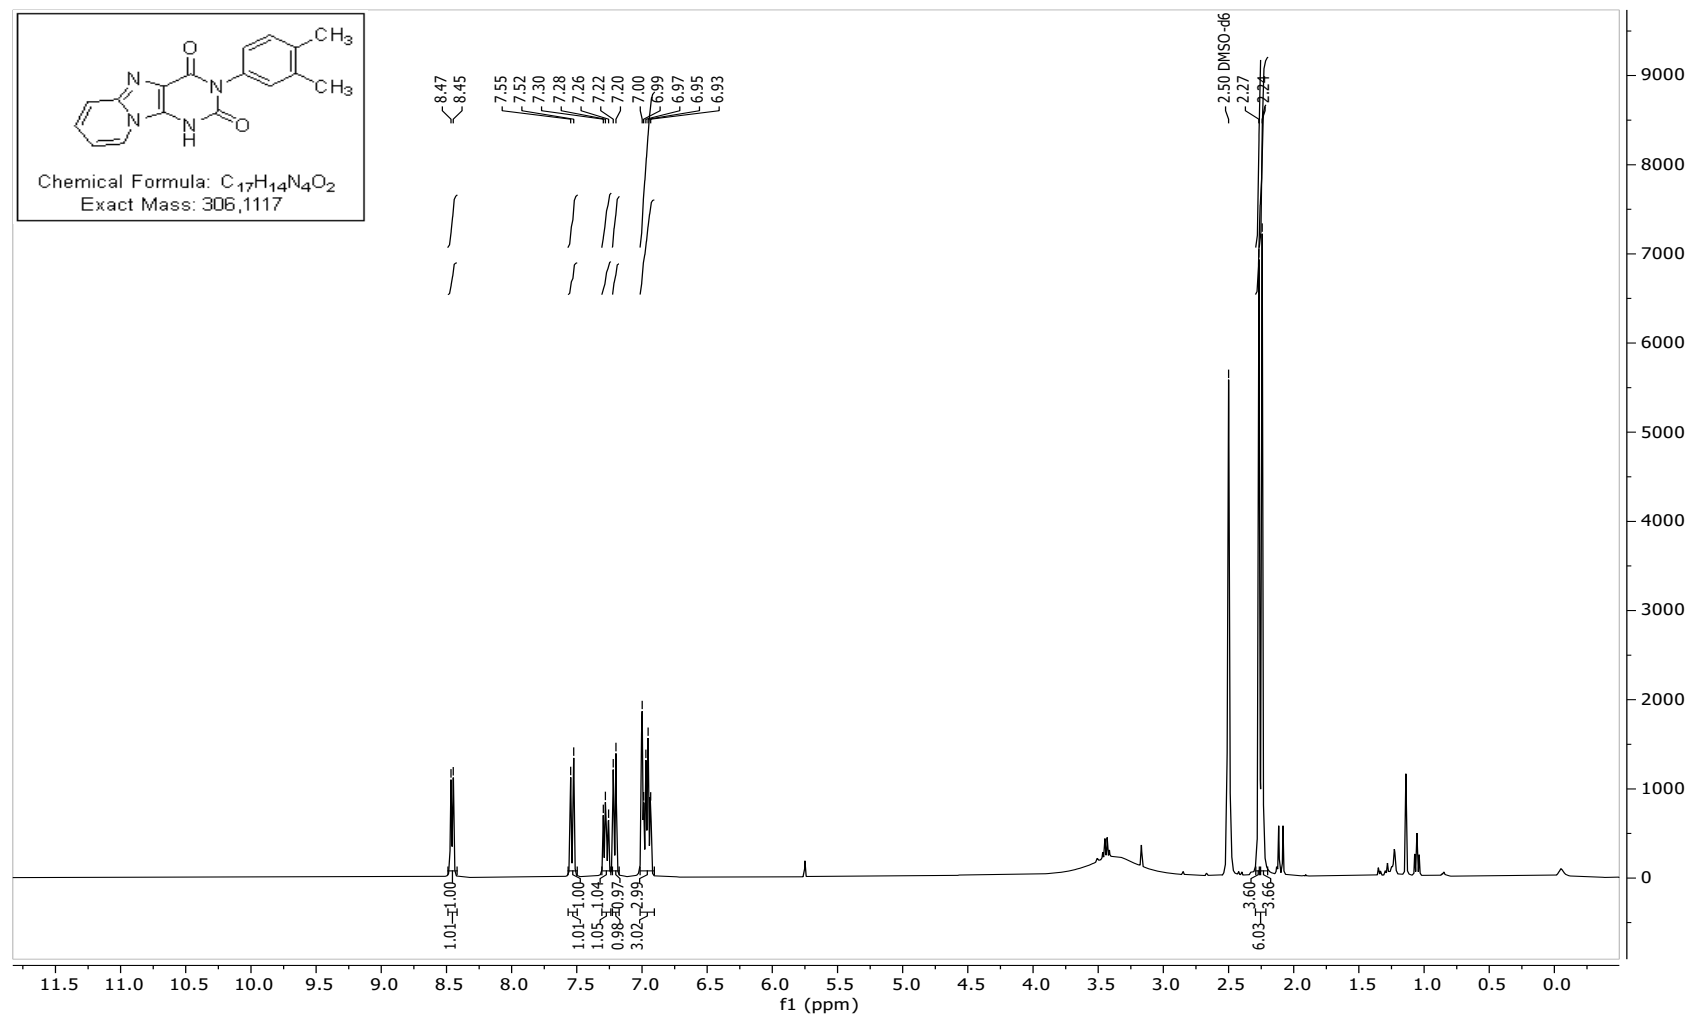

$^{13}\text{C}$  NMR (DMSO- $d_6$ ) of compound **3a**

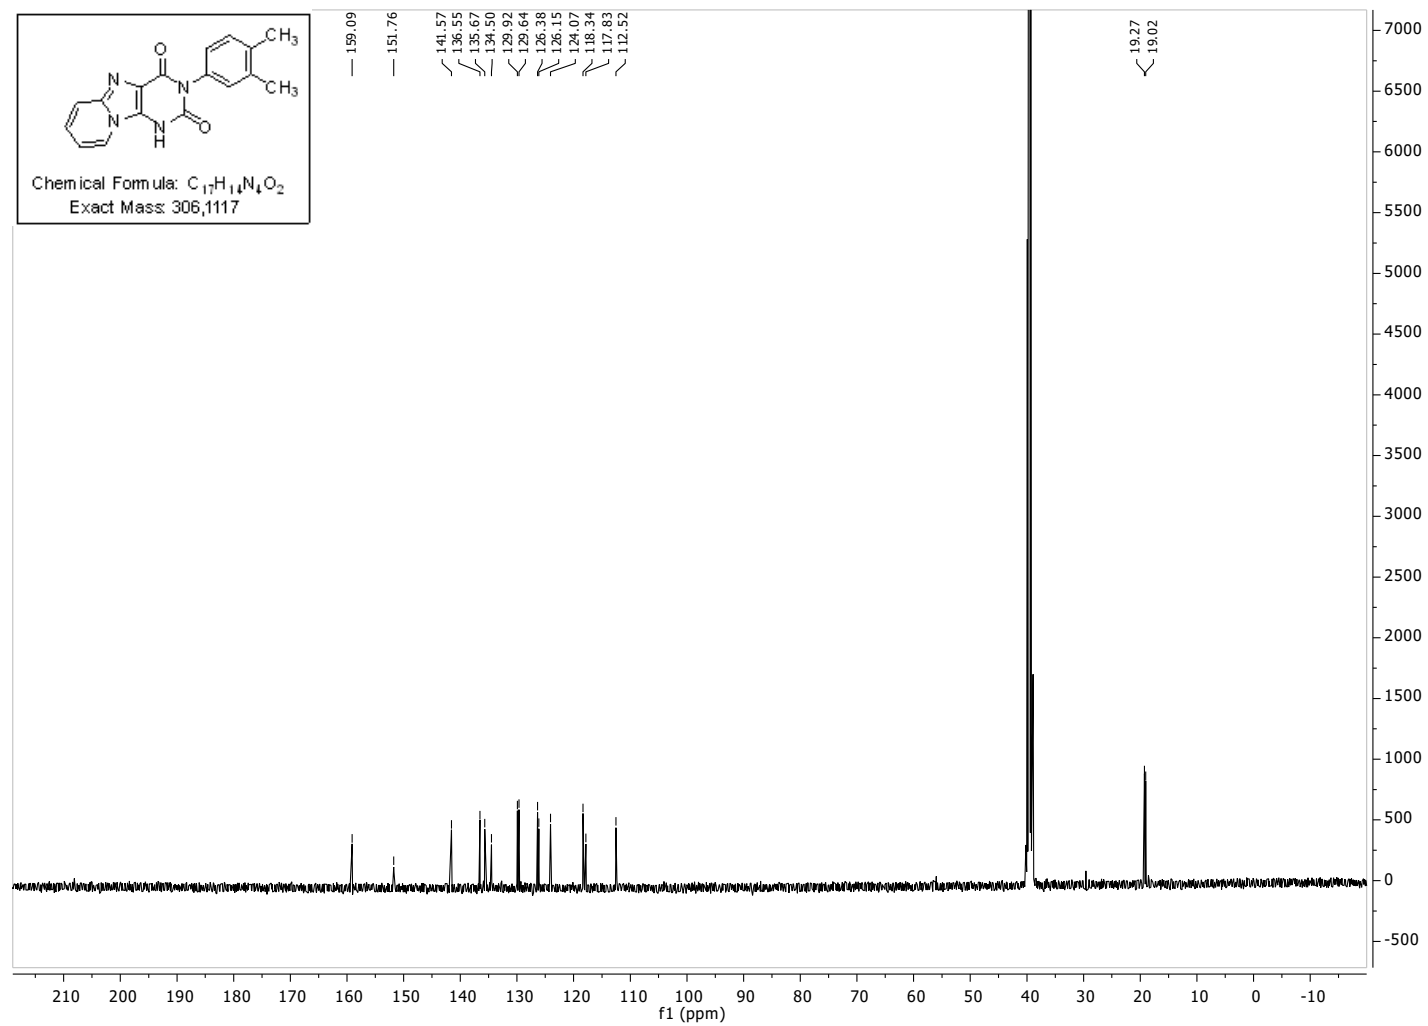

<sup>1</sup>H NMR (DMSO-d<sub>6</sub>) of compound **10b**

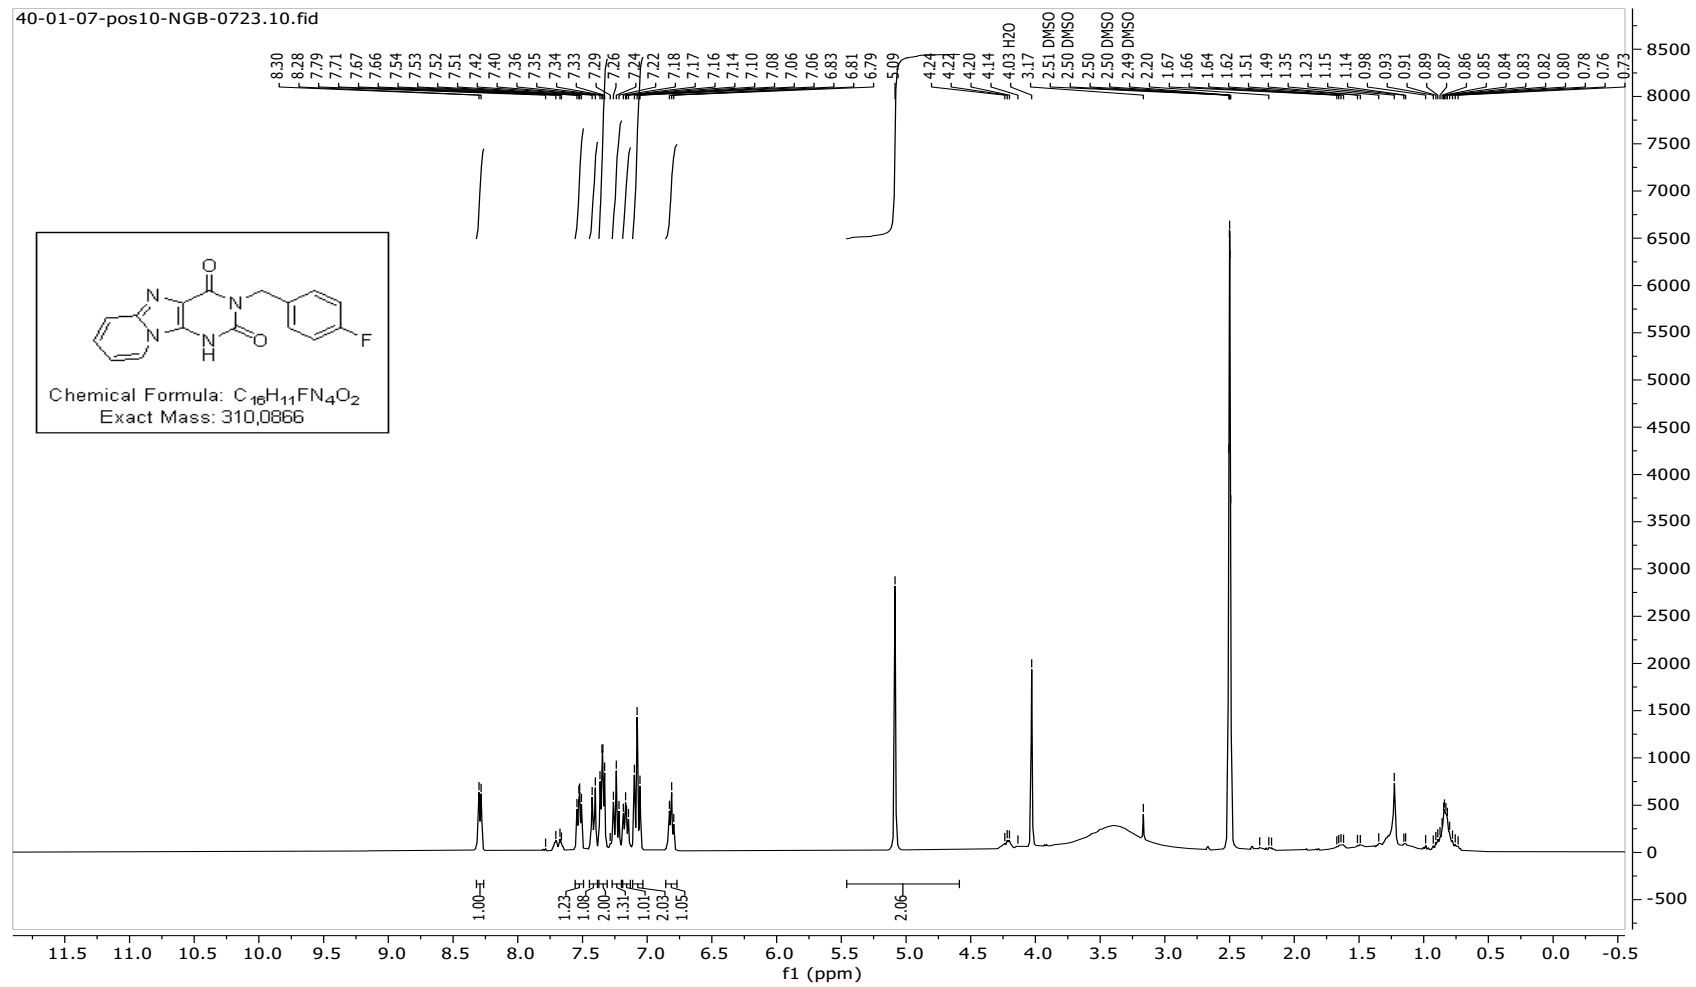

$^{13}\text{C}$  NMR (DMSO- $d_6$ ) of compound **10b**

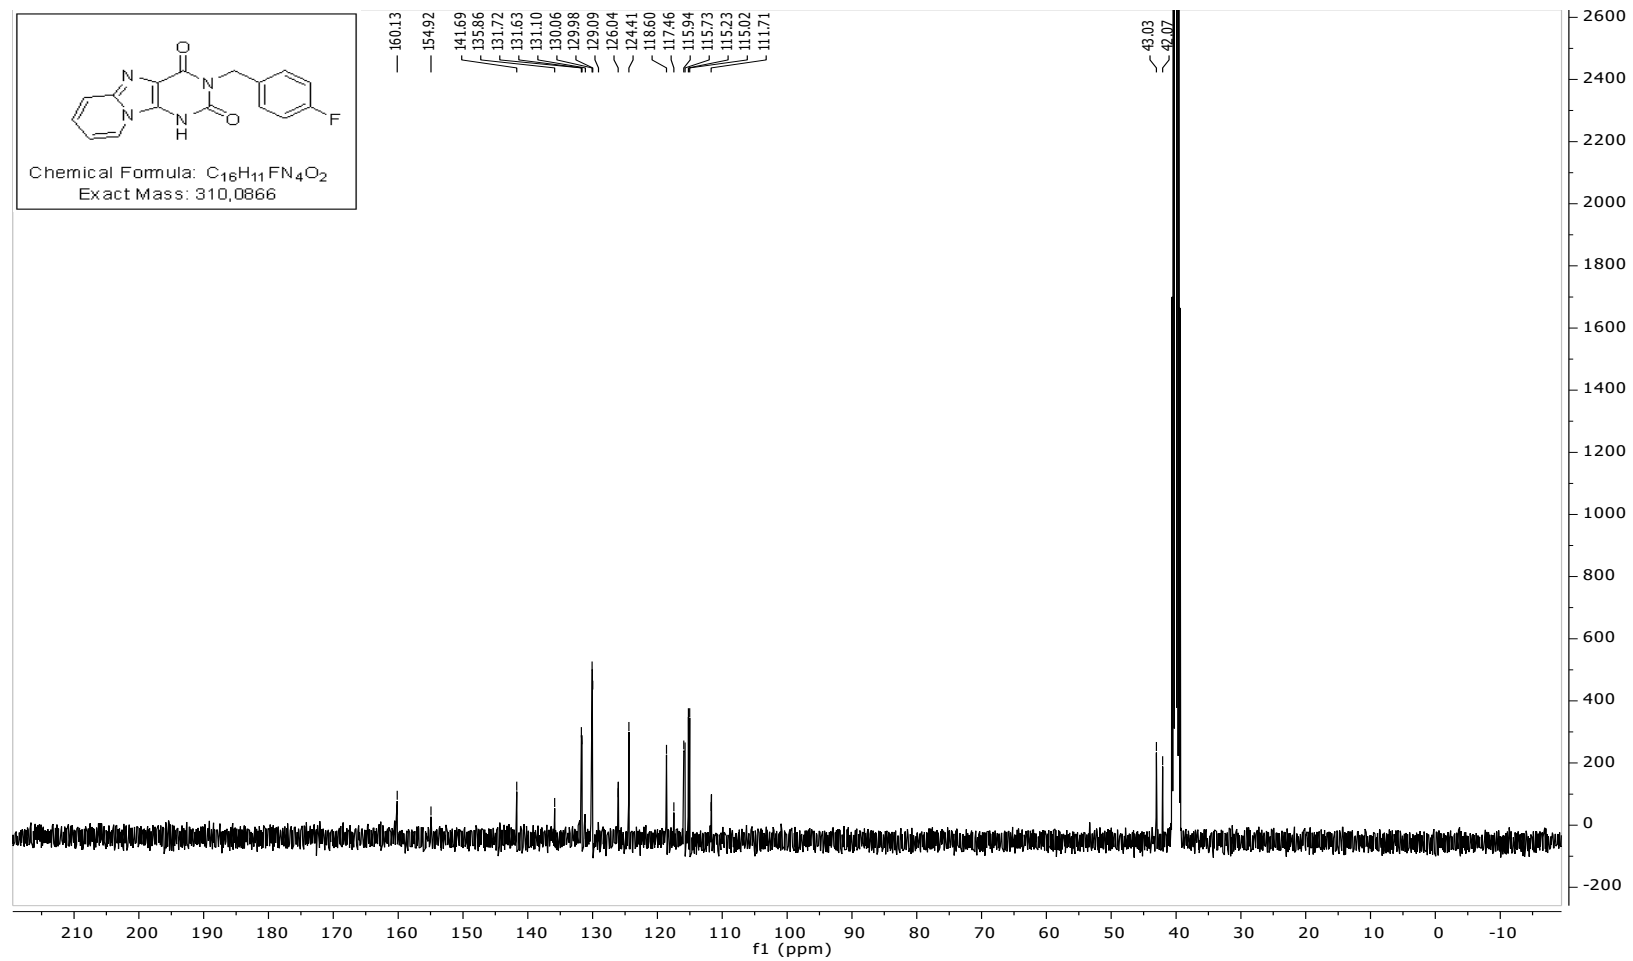

$^1\text{H}$  NMR (DMSO- $d_6$ ) of compound **10c**

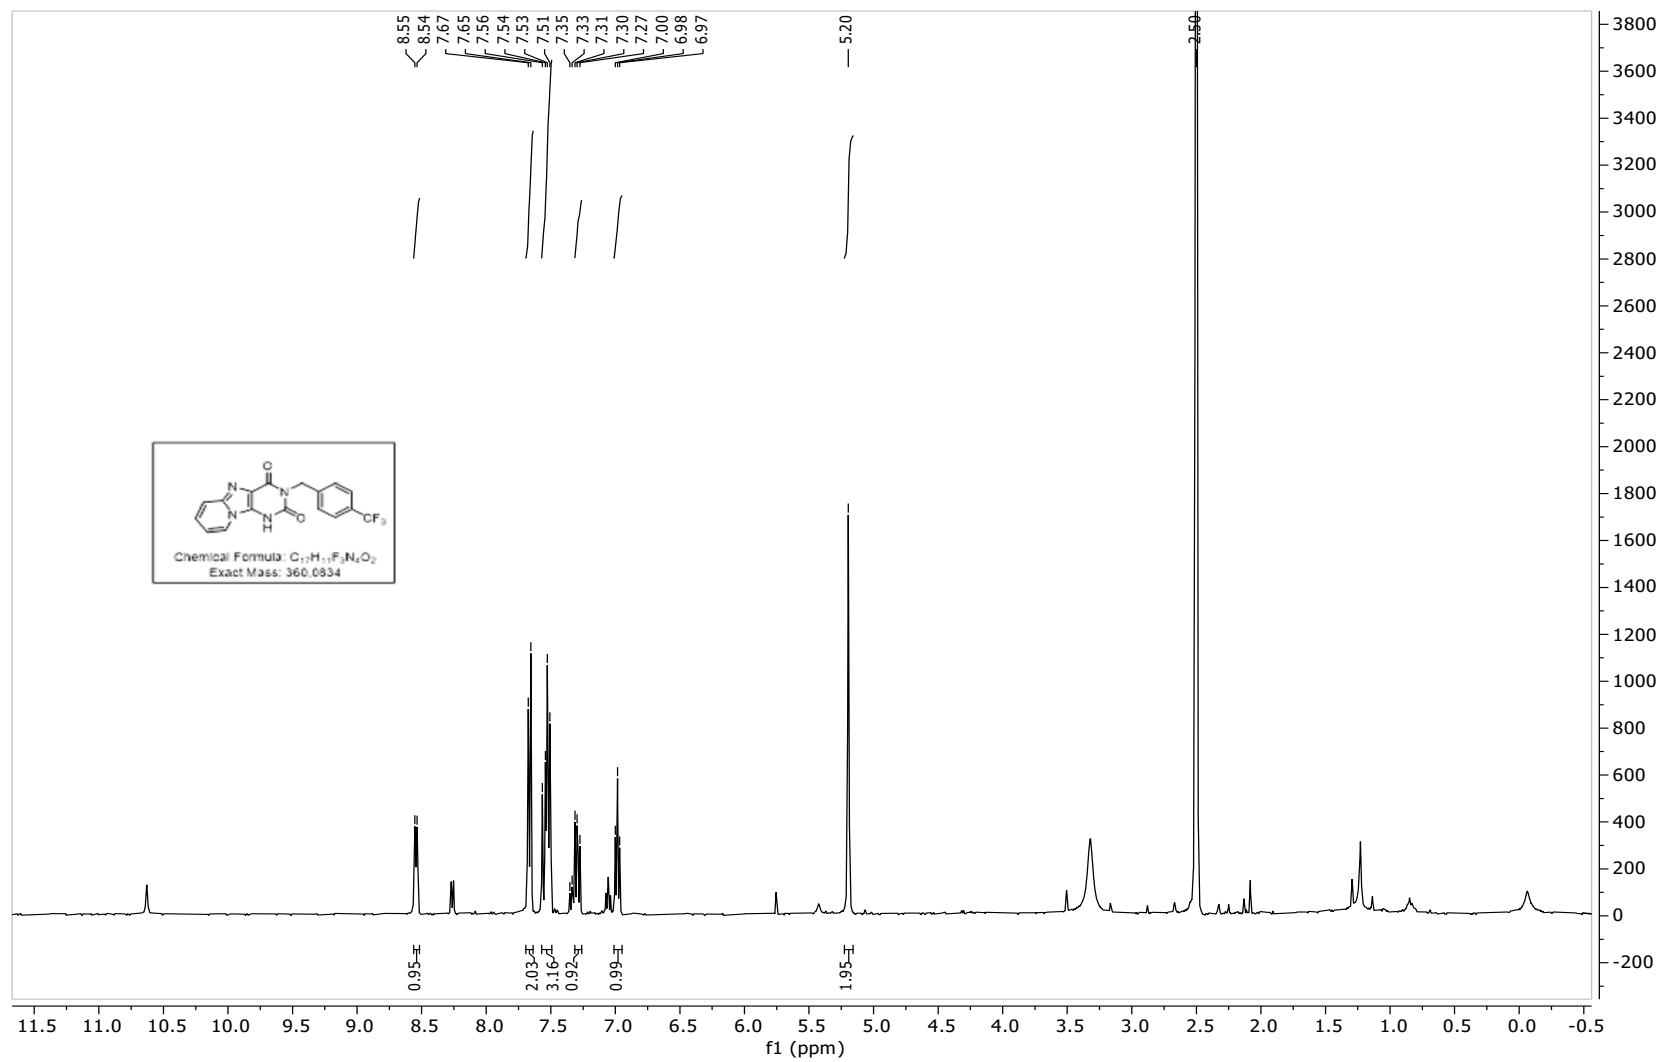



$^{13}\text{C}$  NMR (DMSO- $d_6$ ) of compound **10c**

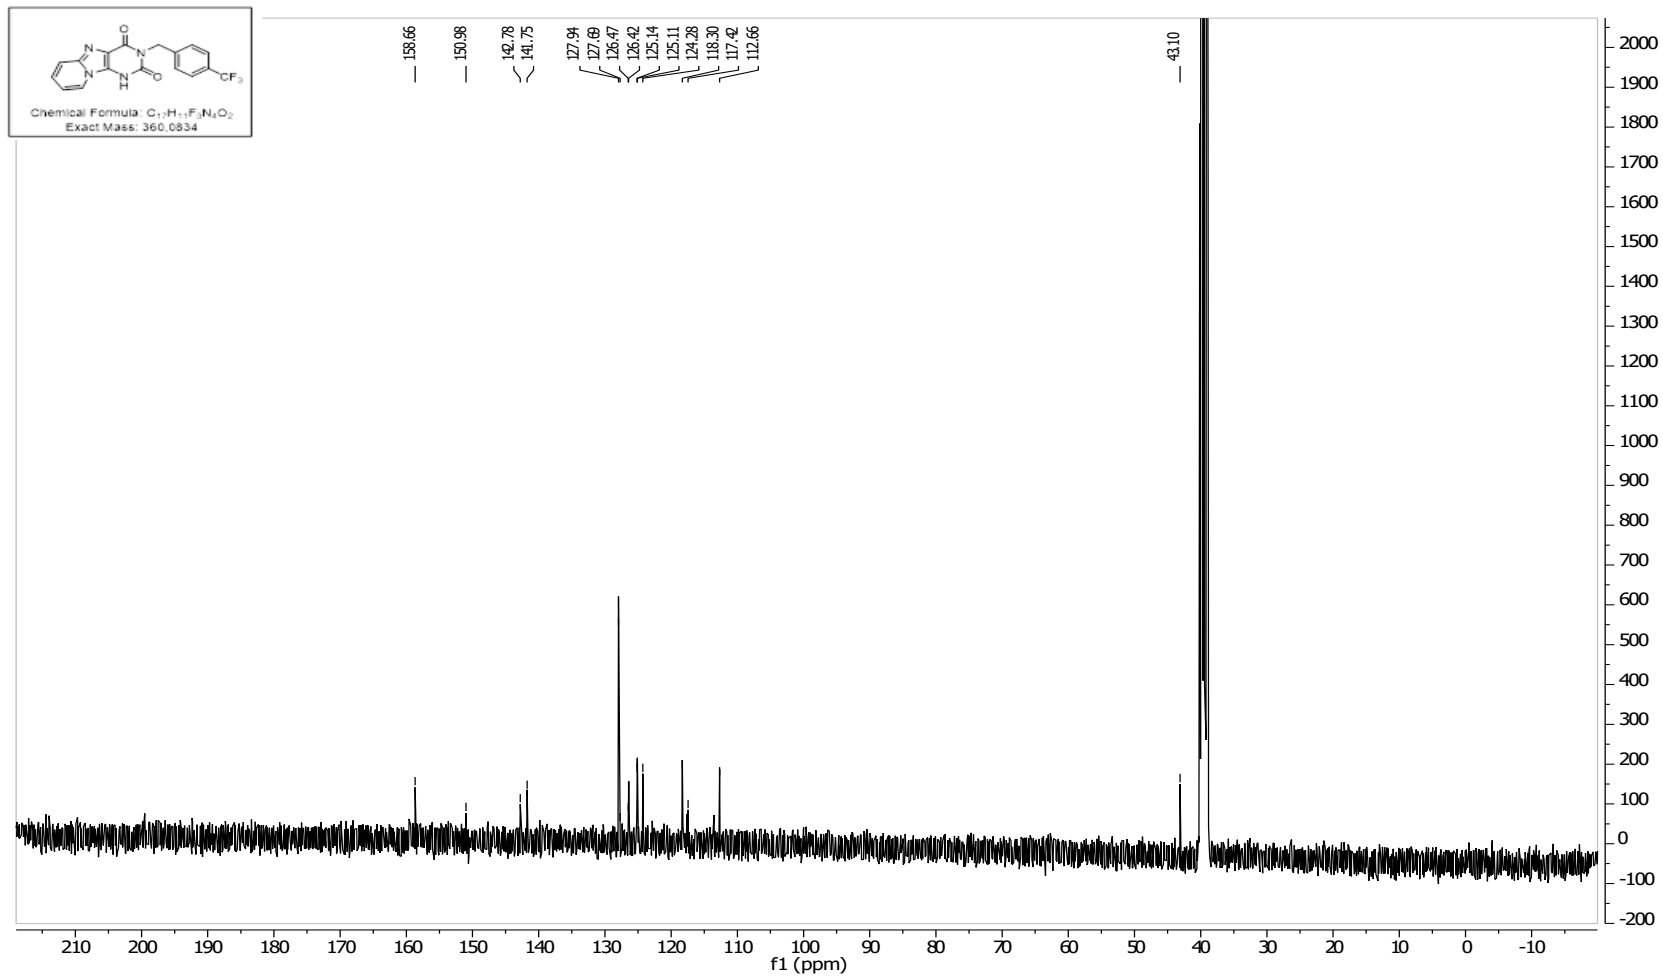

<sup>1</sup>H NMR (DMSO-d<sub>6</sub>) of compound **10d**

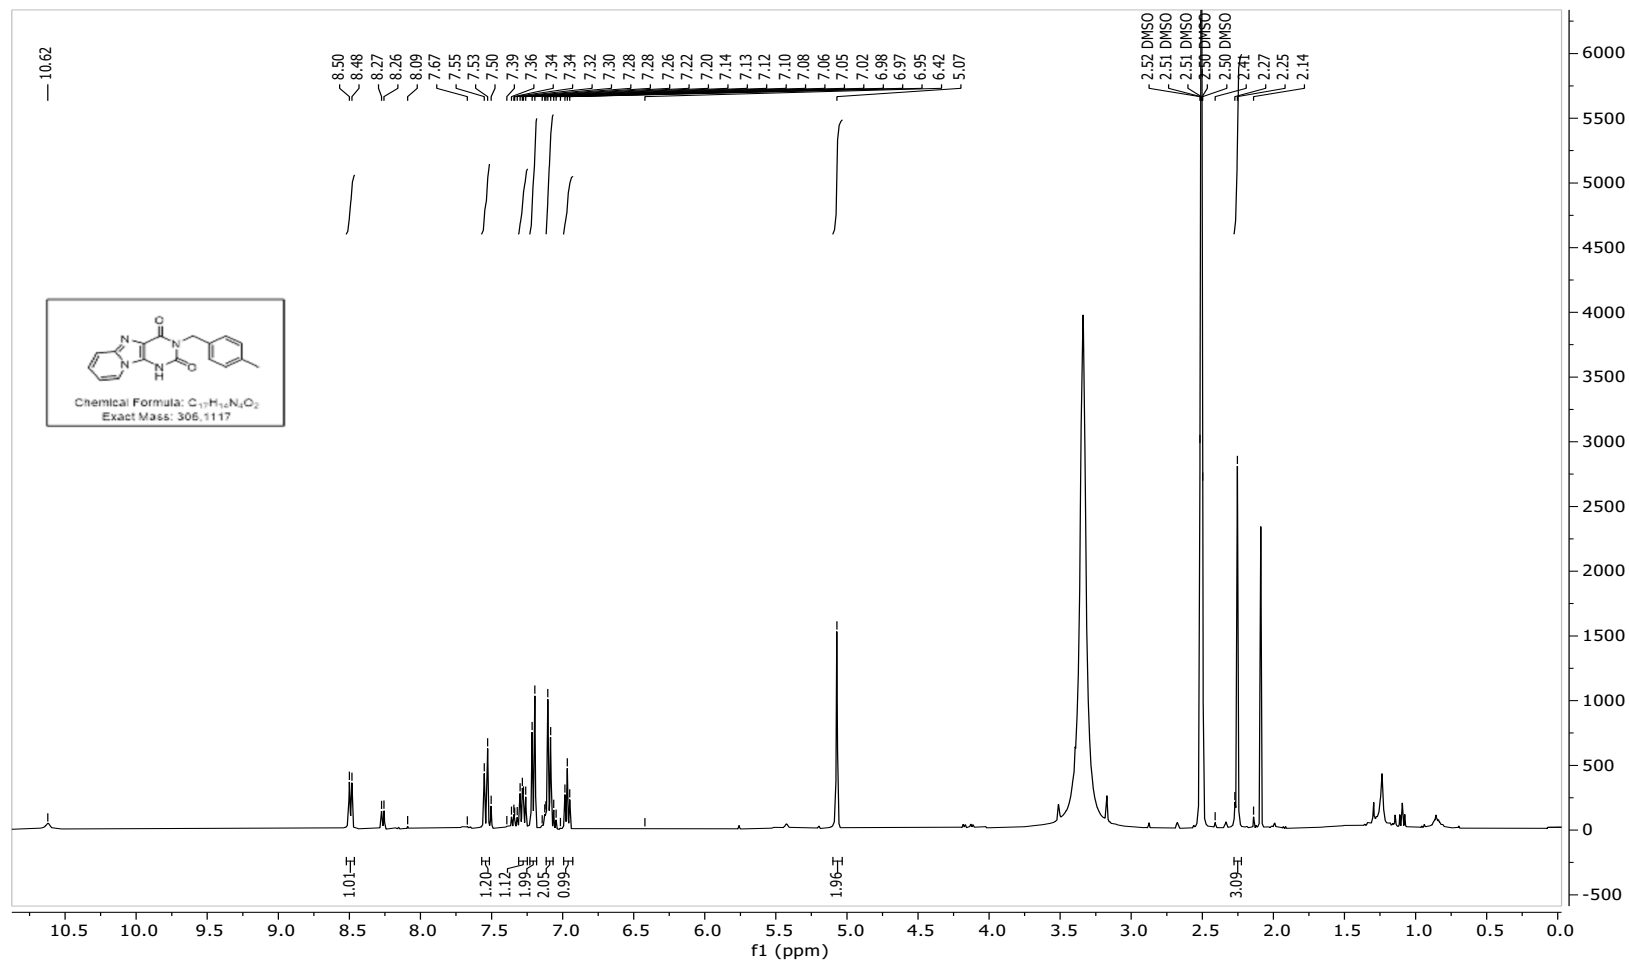

$^{13}\text{C}$  NMR (DMSO- $d_6$ ) of compound **10d**

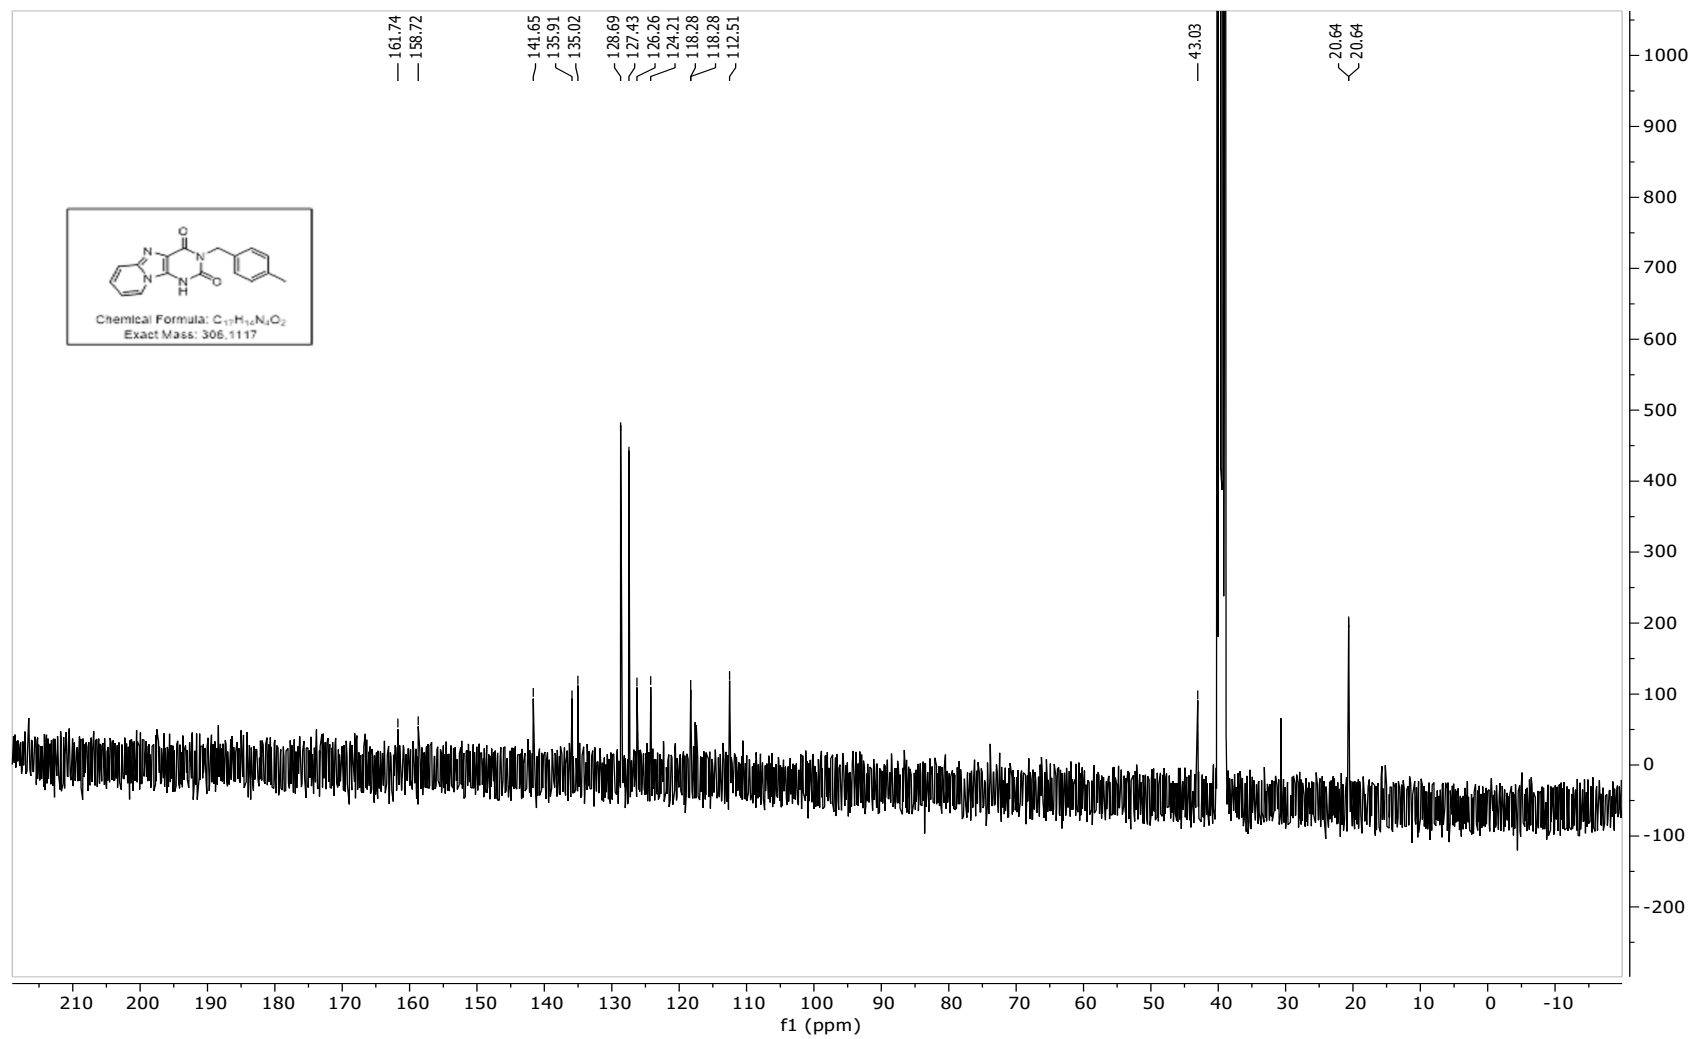

<sup>1</sup>H NMR (DMSO-d<sub>6</sub>) of compound **13e**

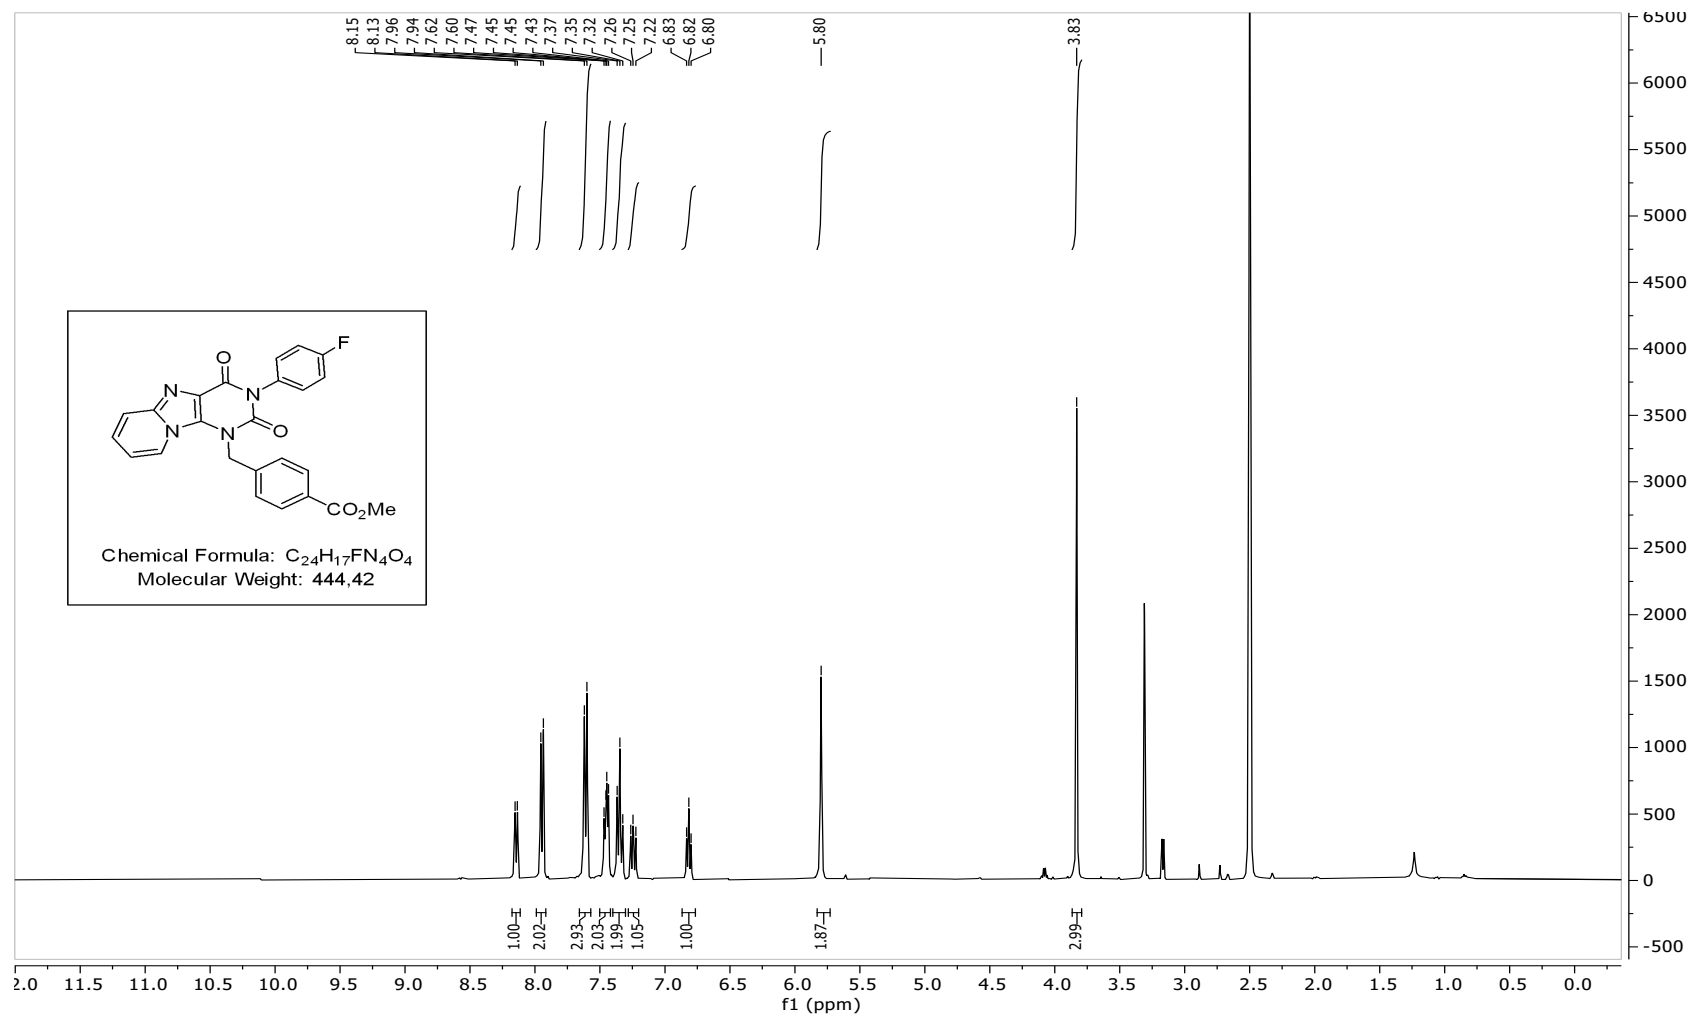

$^{13}\text{C}$  NMR (DMSO-d<sub>6</sub>) of compound **13e**

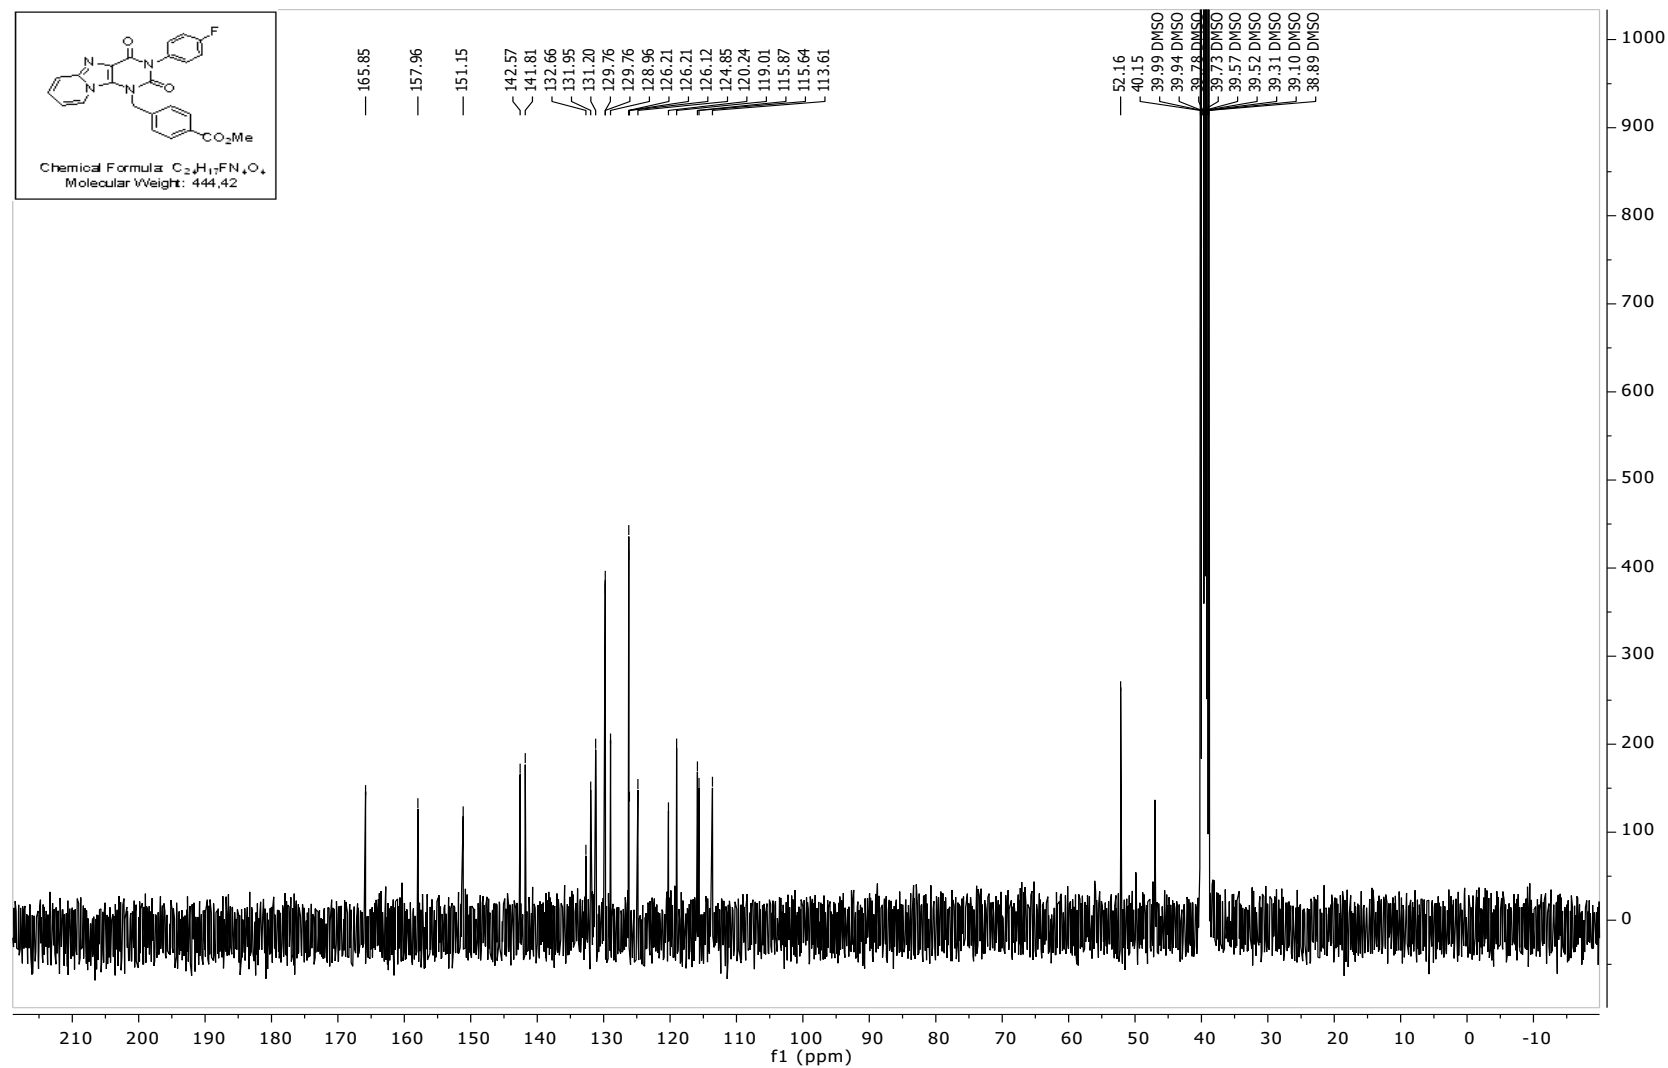

$^1\text{H}$  NMR (DMSO- $d_6$ ) of compound **18a**

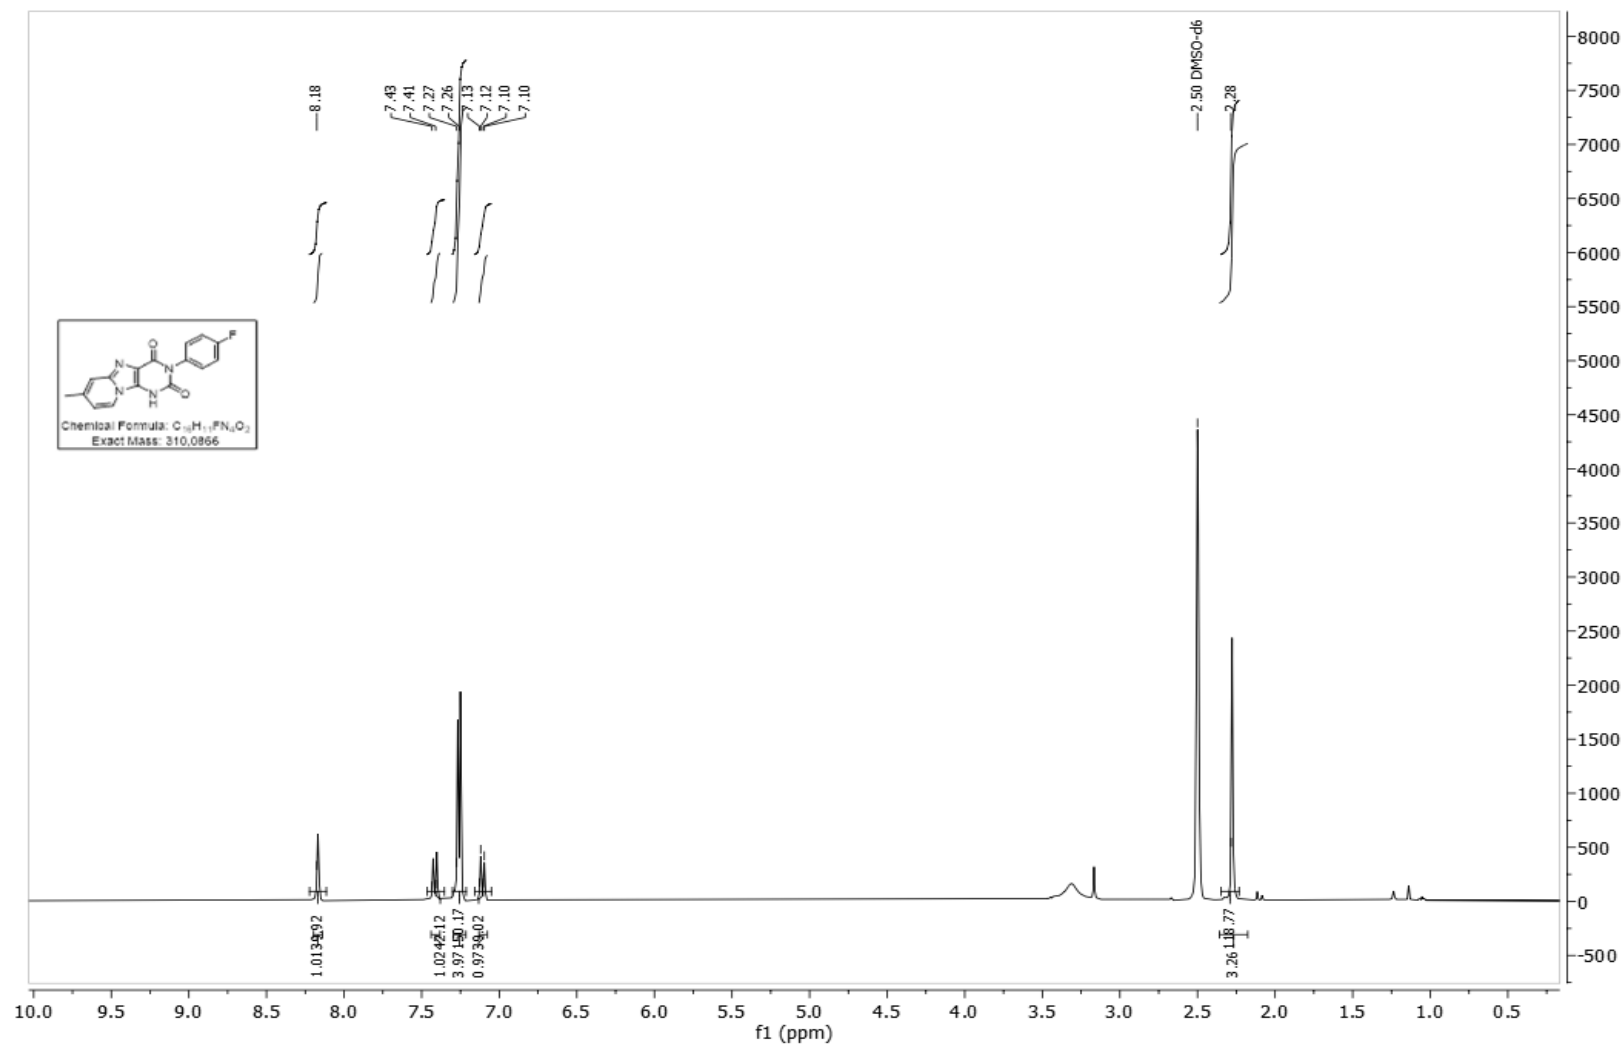

$^{13}\text{C}$  NMR (DMSO-d<sub>6</sub>) of compound **18a**

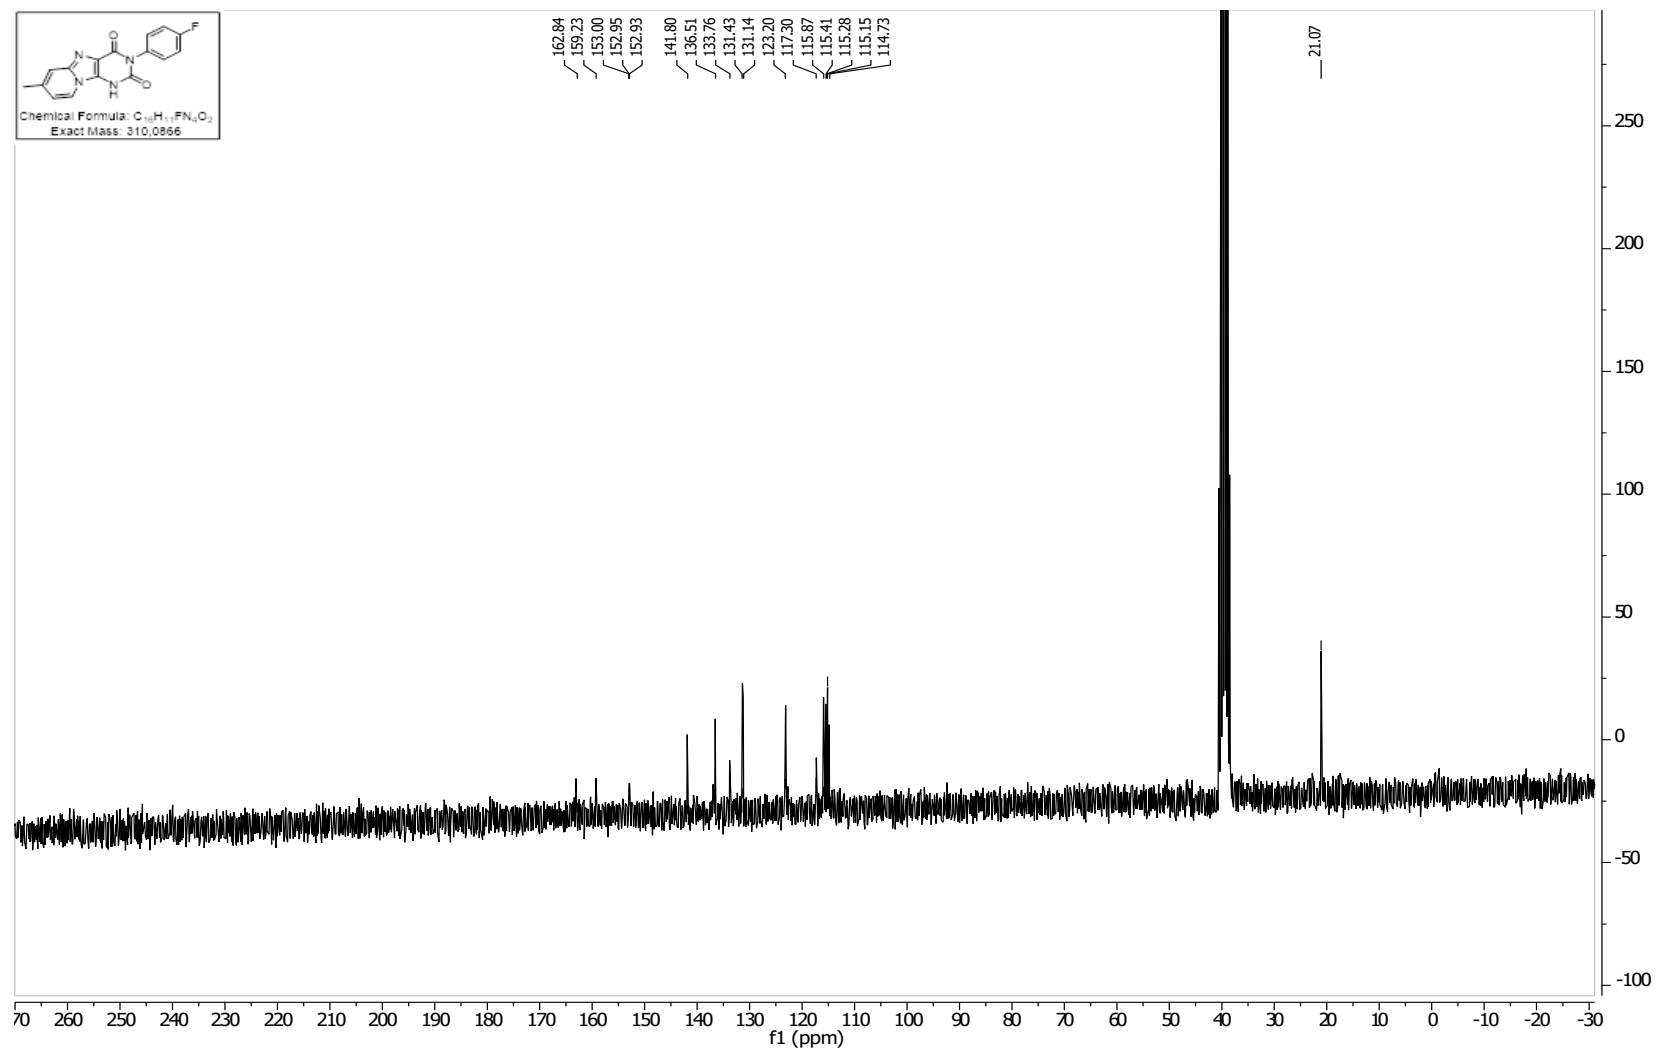

$^1\text{H}$  NMR (DMSO- $d_6$ ) of compound **20e**

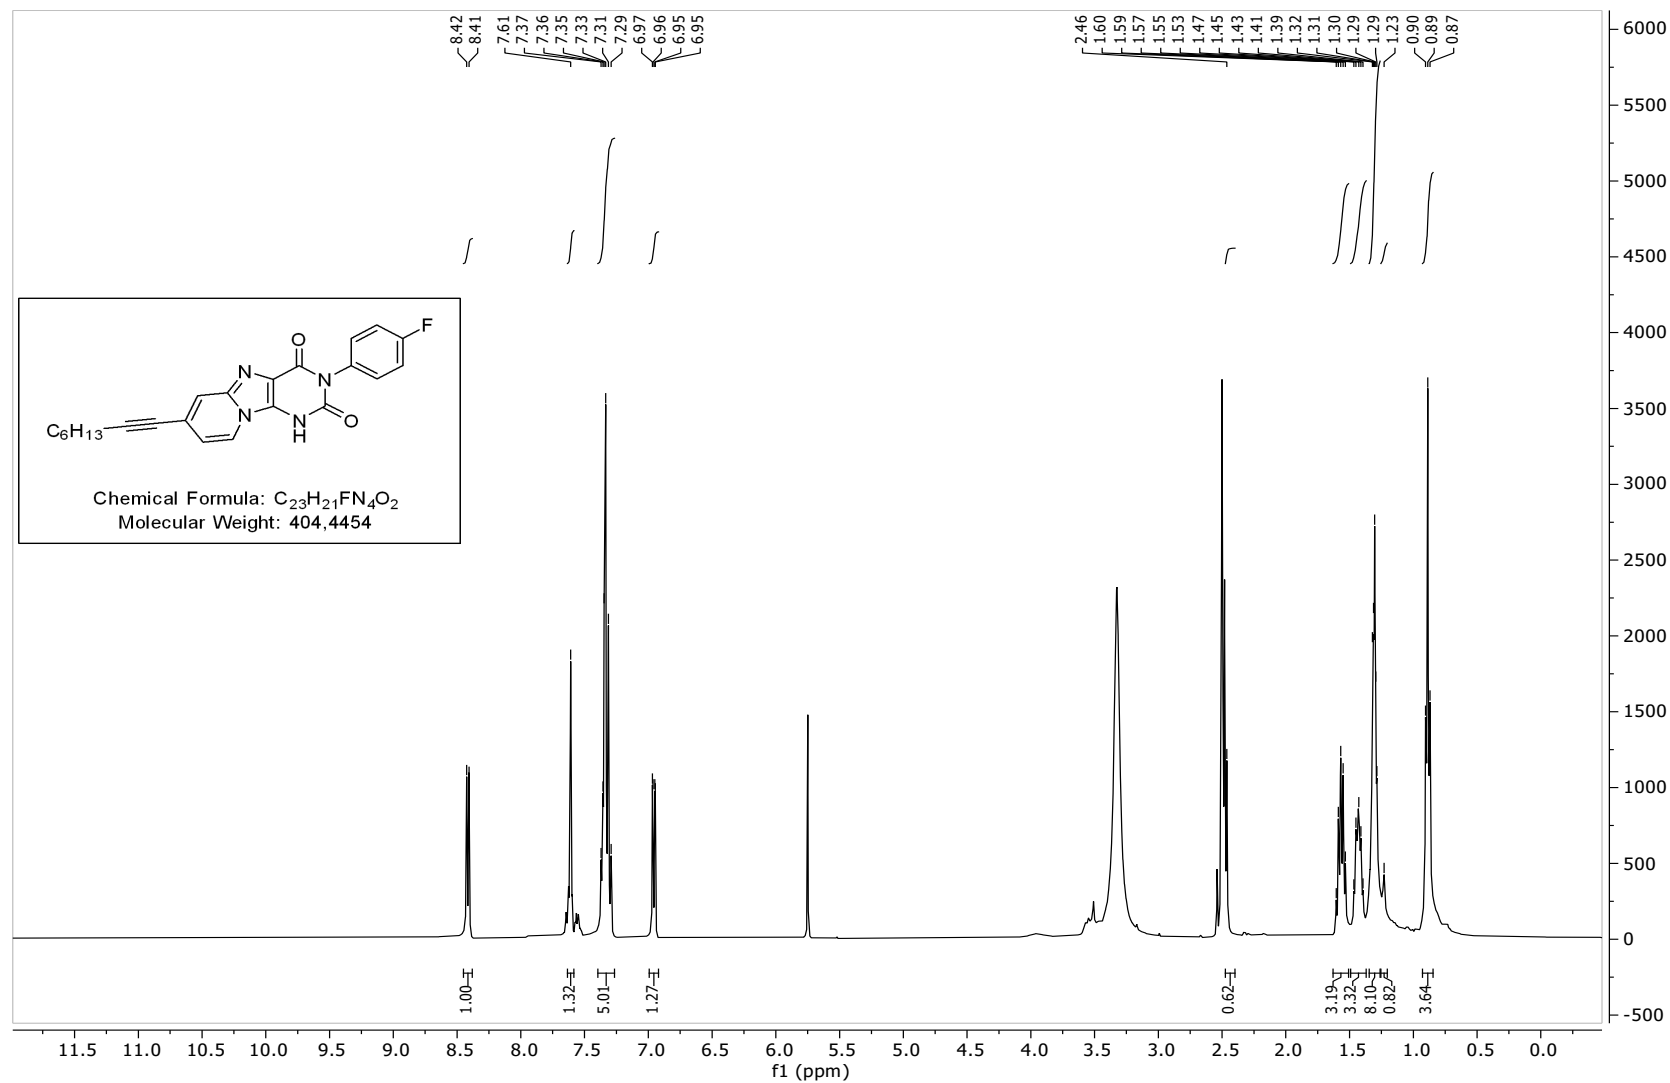



$^{13}\text{C}$  NMR (DMSO-d<sub>6</sub>) of compound **20e**

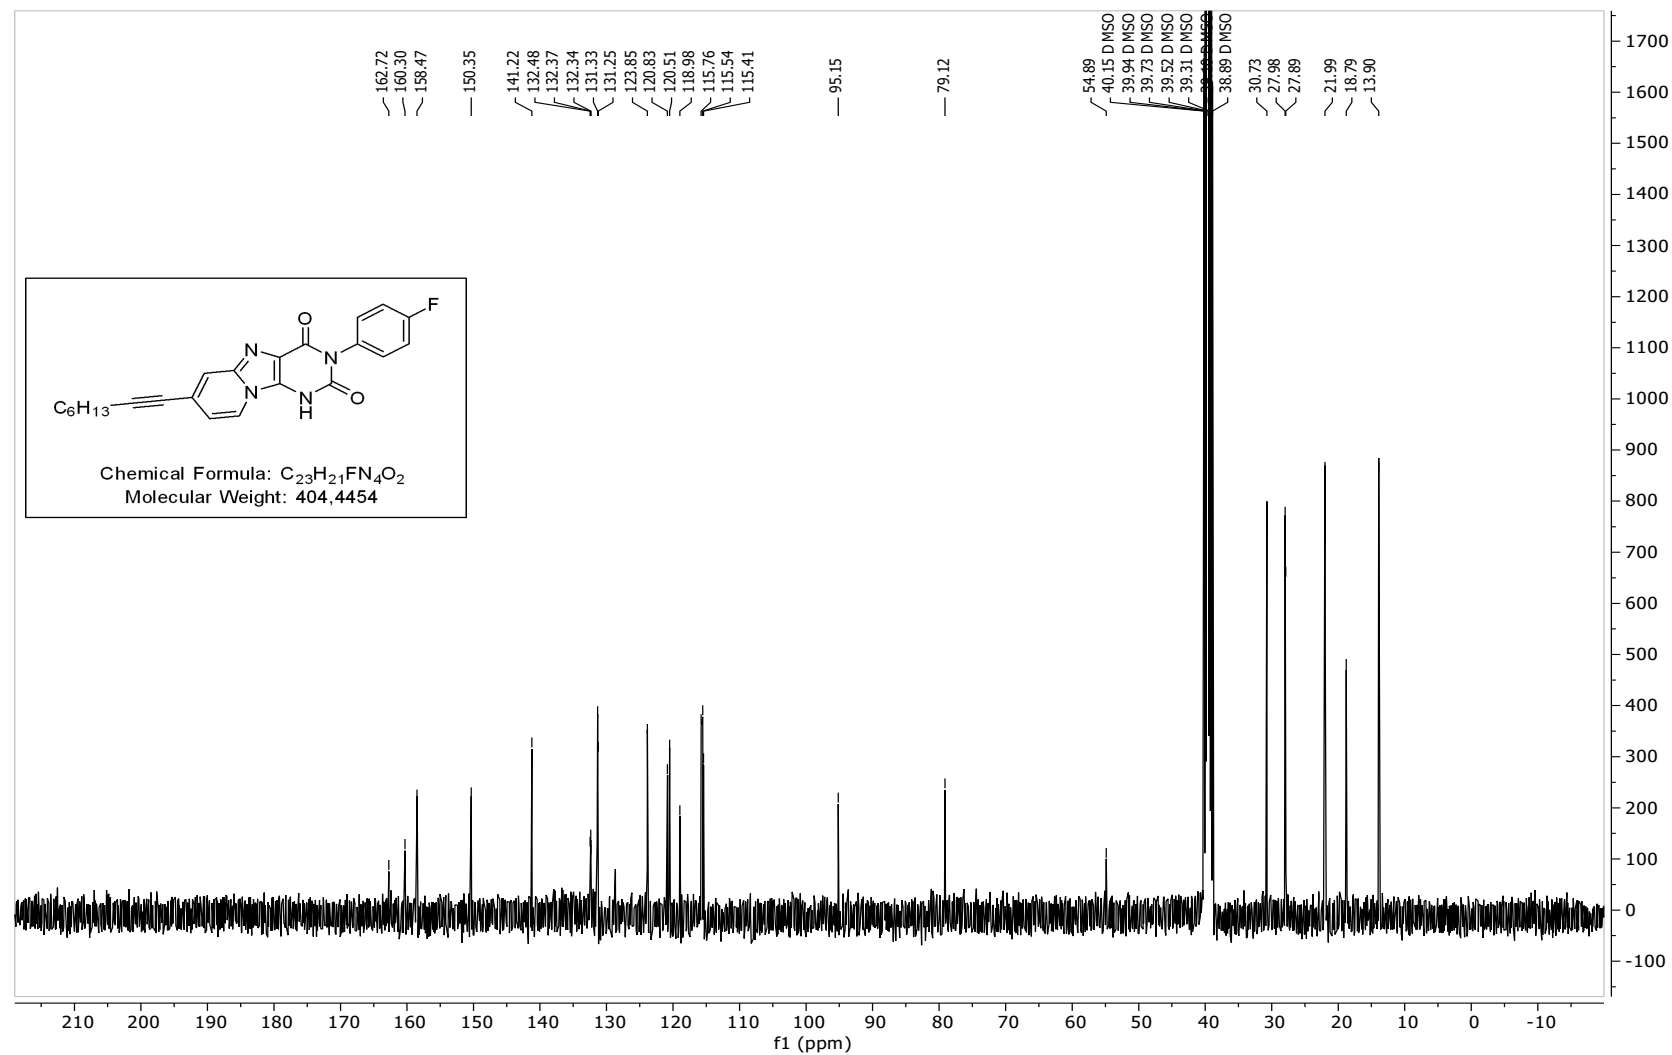

<sup>1</sup>H NMR (DMSO-d<sub>6</sub>) of compound **21a**

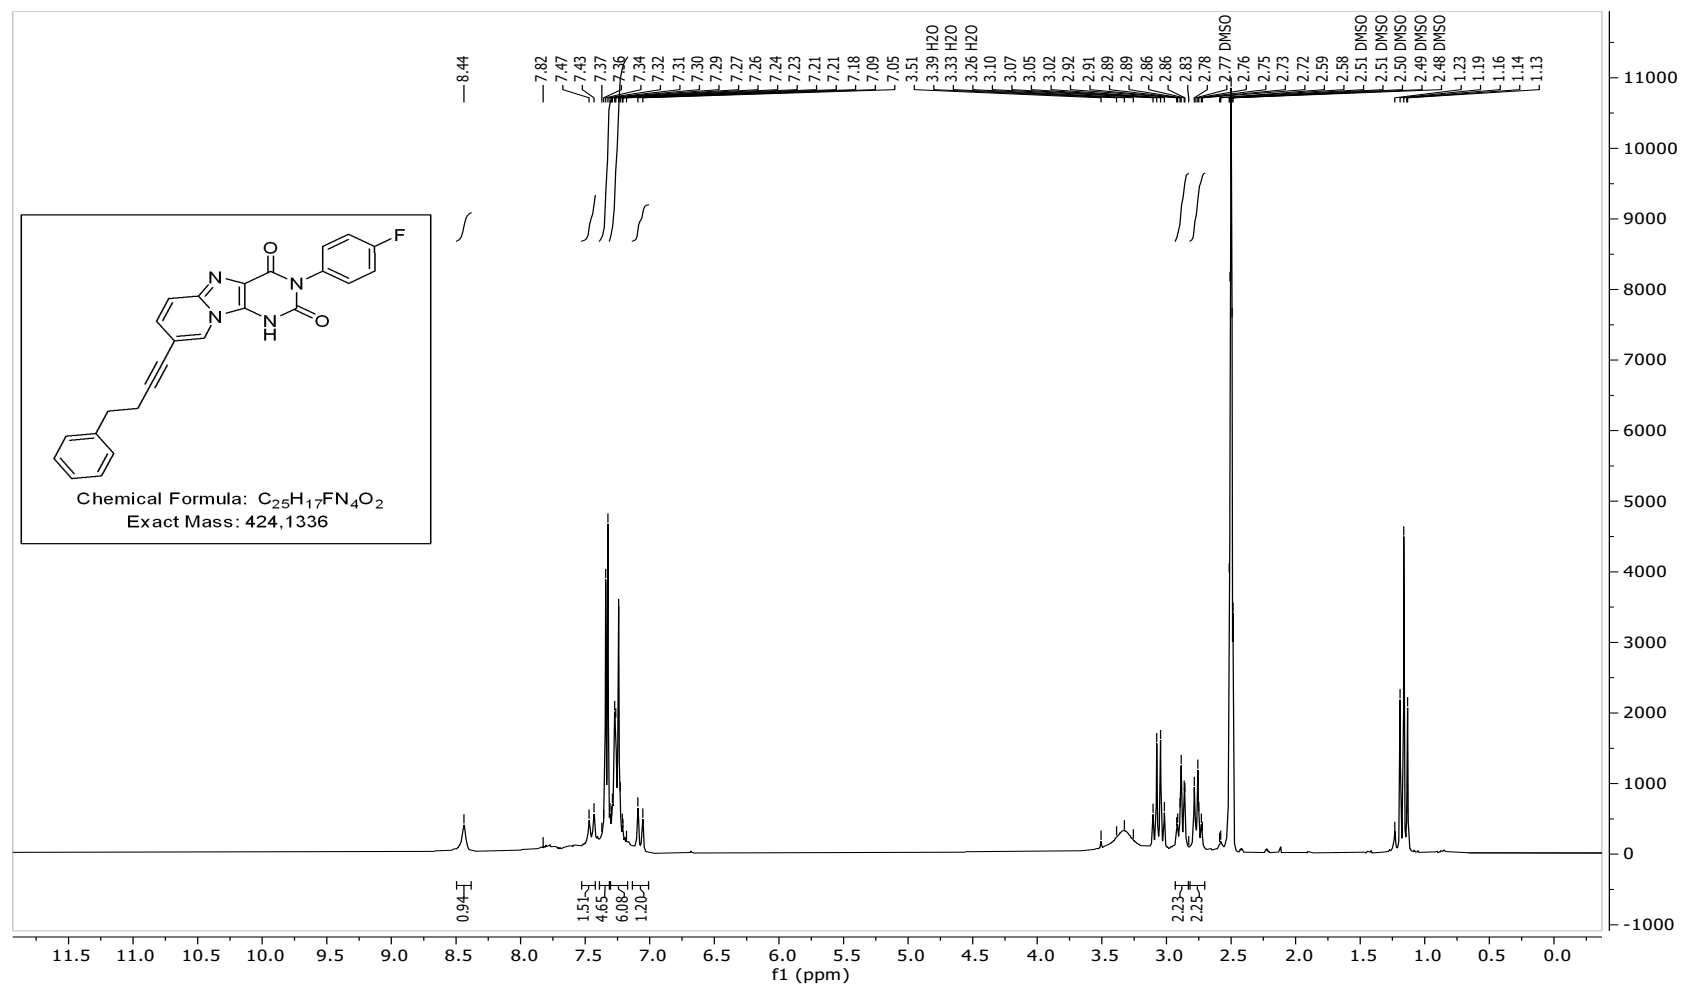

$^{13}\text{C}$  NMR (DMSO-d<sub>6</sub>) of compound **21a**

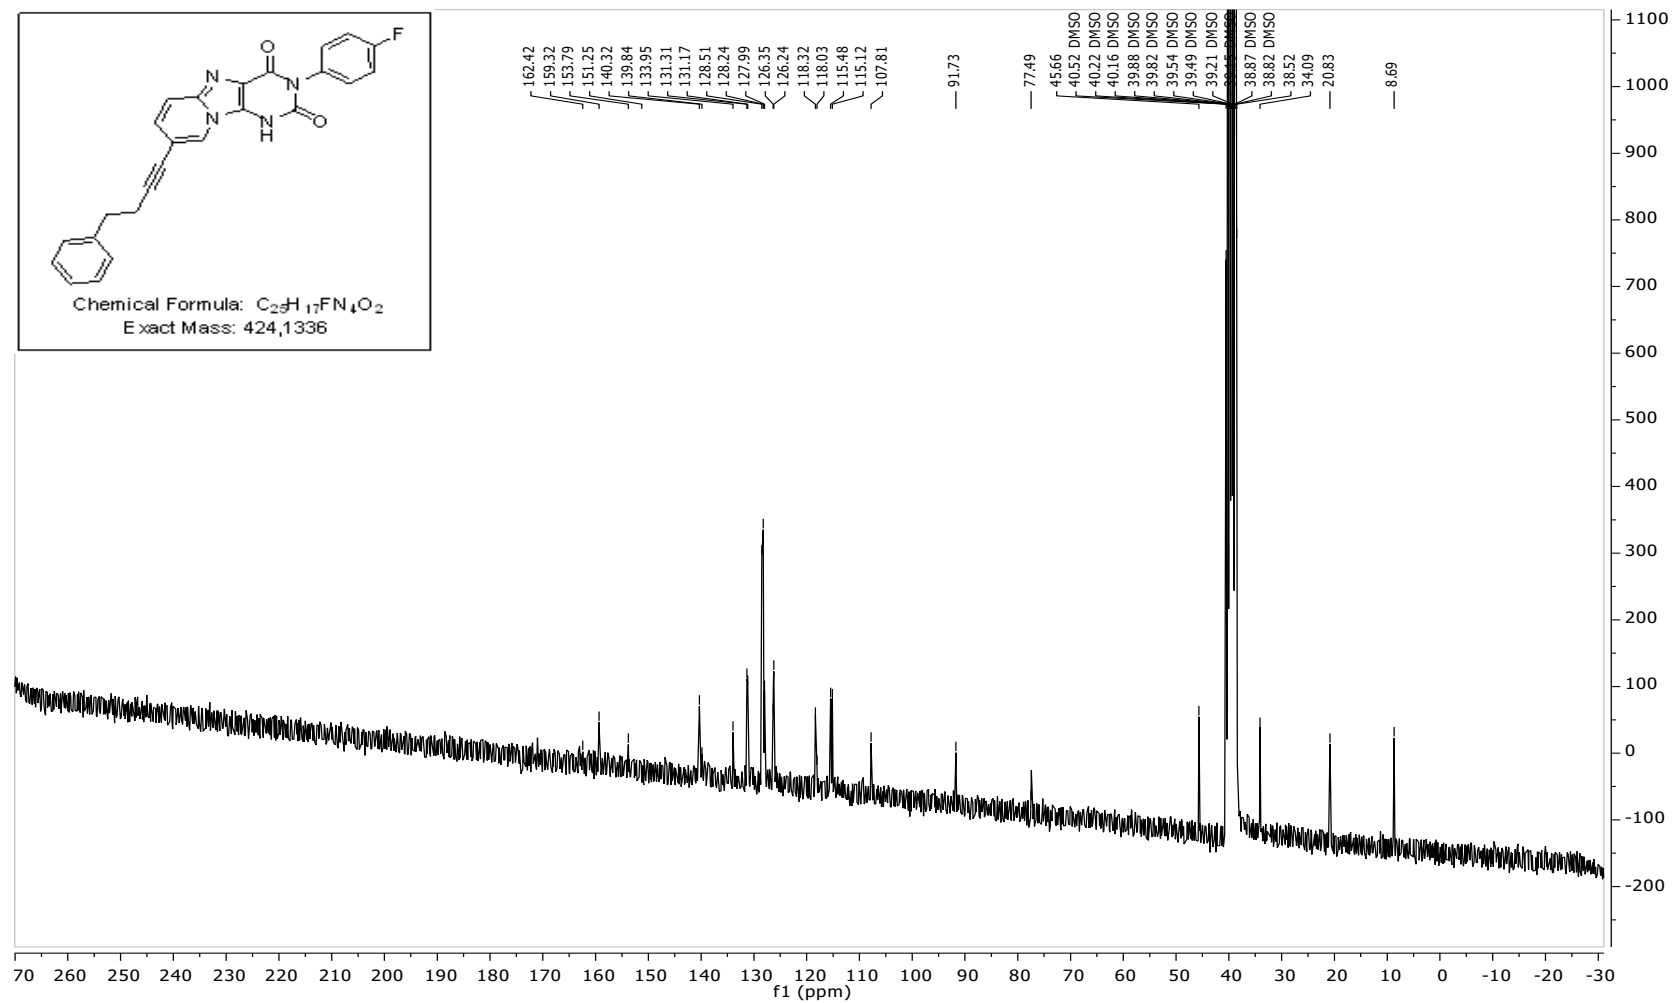

<sup>1</sup>H NMR (DMSO-d<sub>6</sub>) of compound **22b**

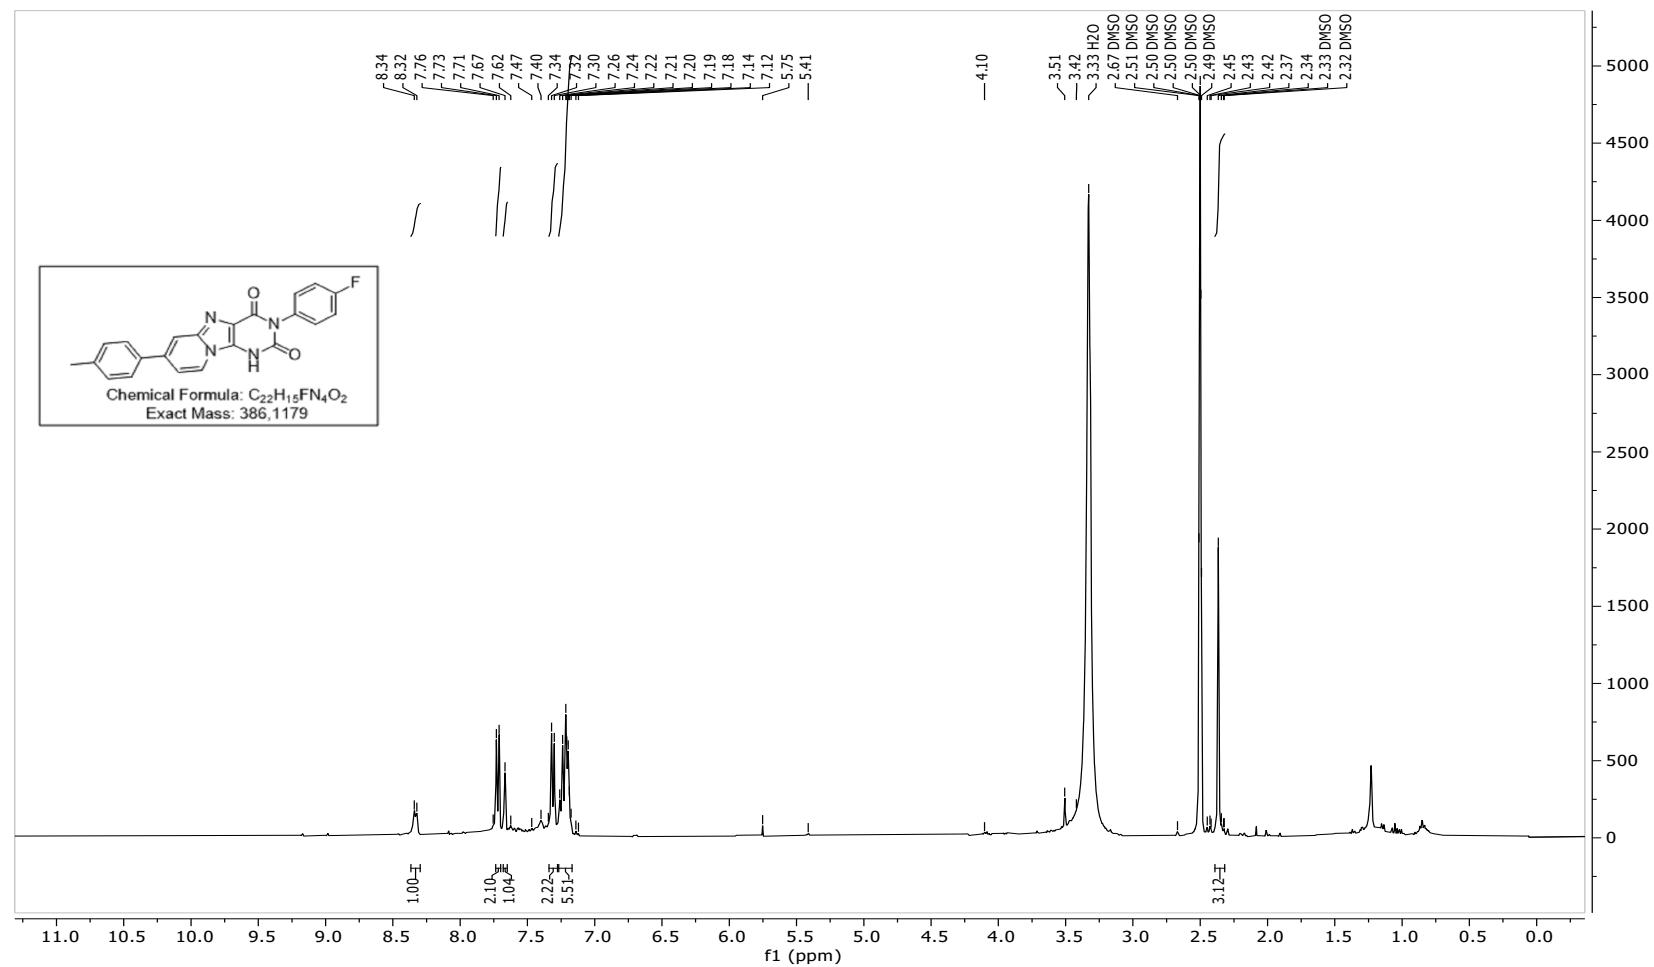

$^{13}\text{C}$  NMR (DMSO- $d_6$ ) of compound **22b**

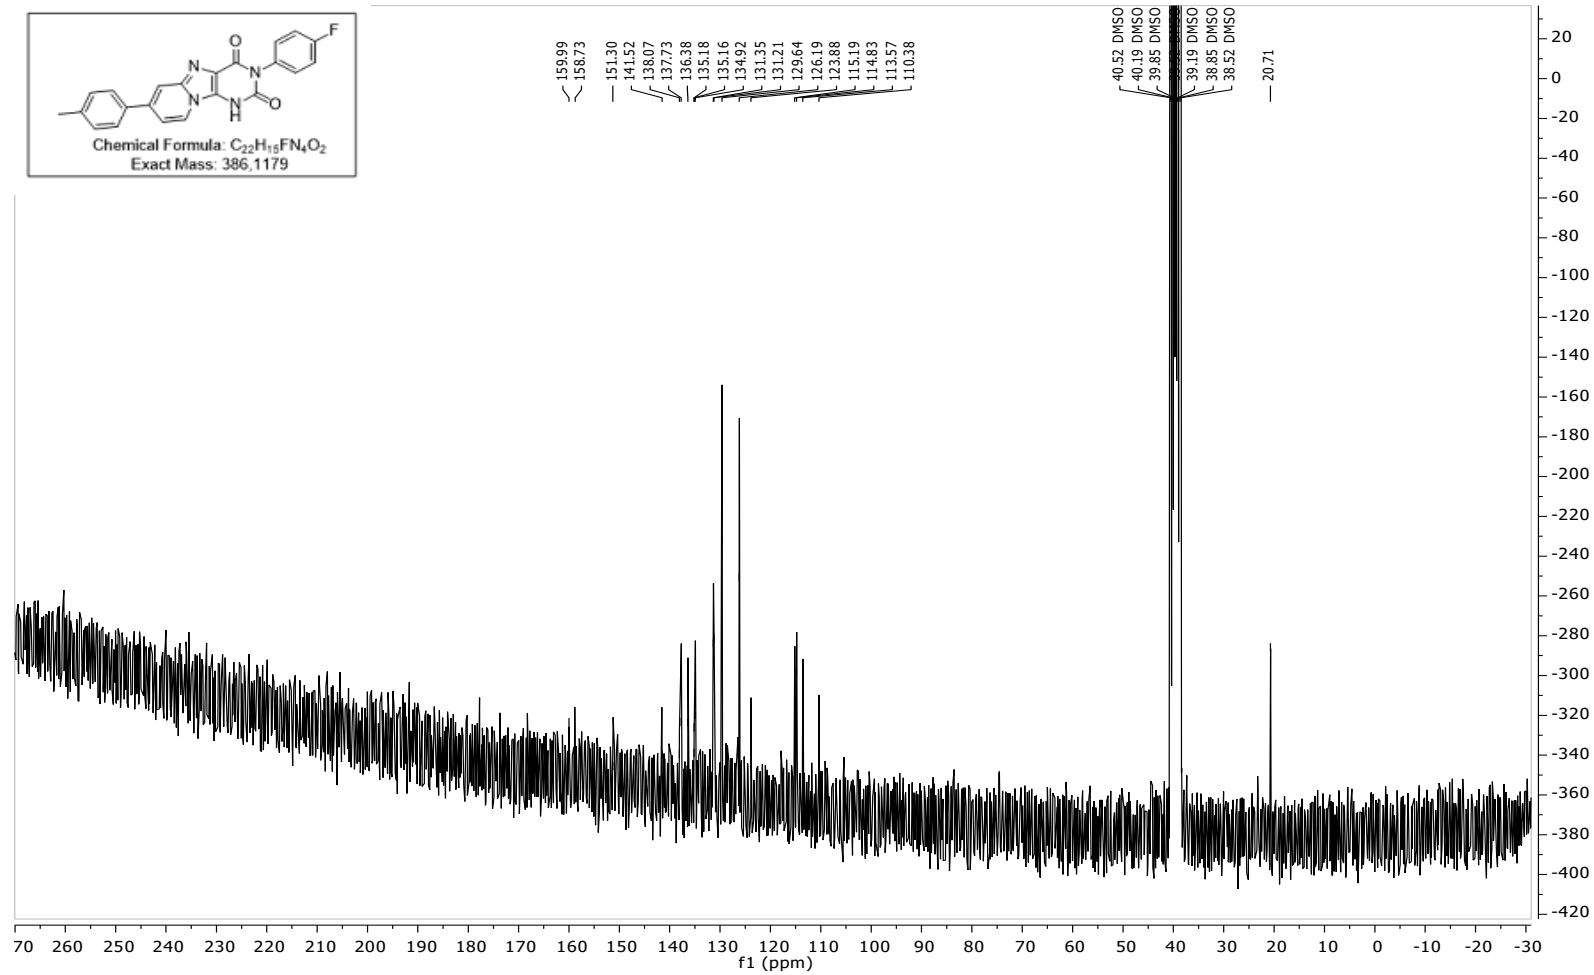

<sup>1</sup>H NMR (DMSO-d<sub>6</sub>) of compound **23a**

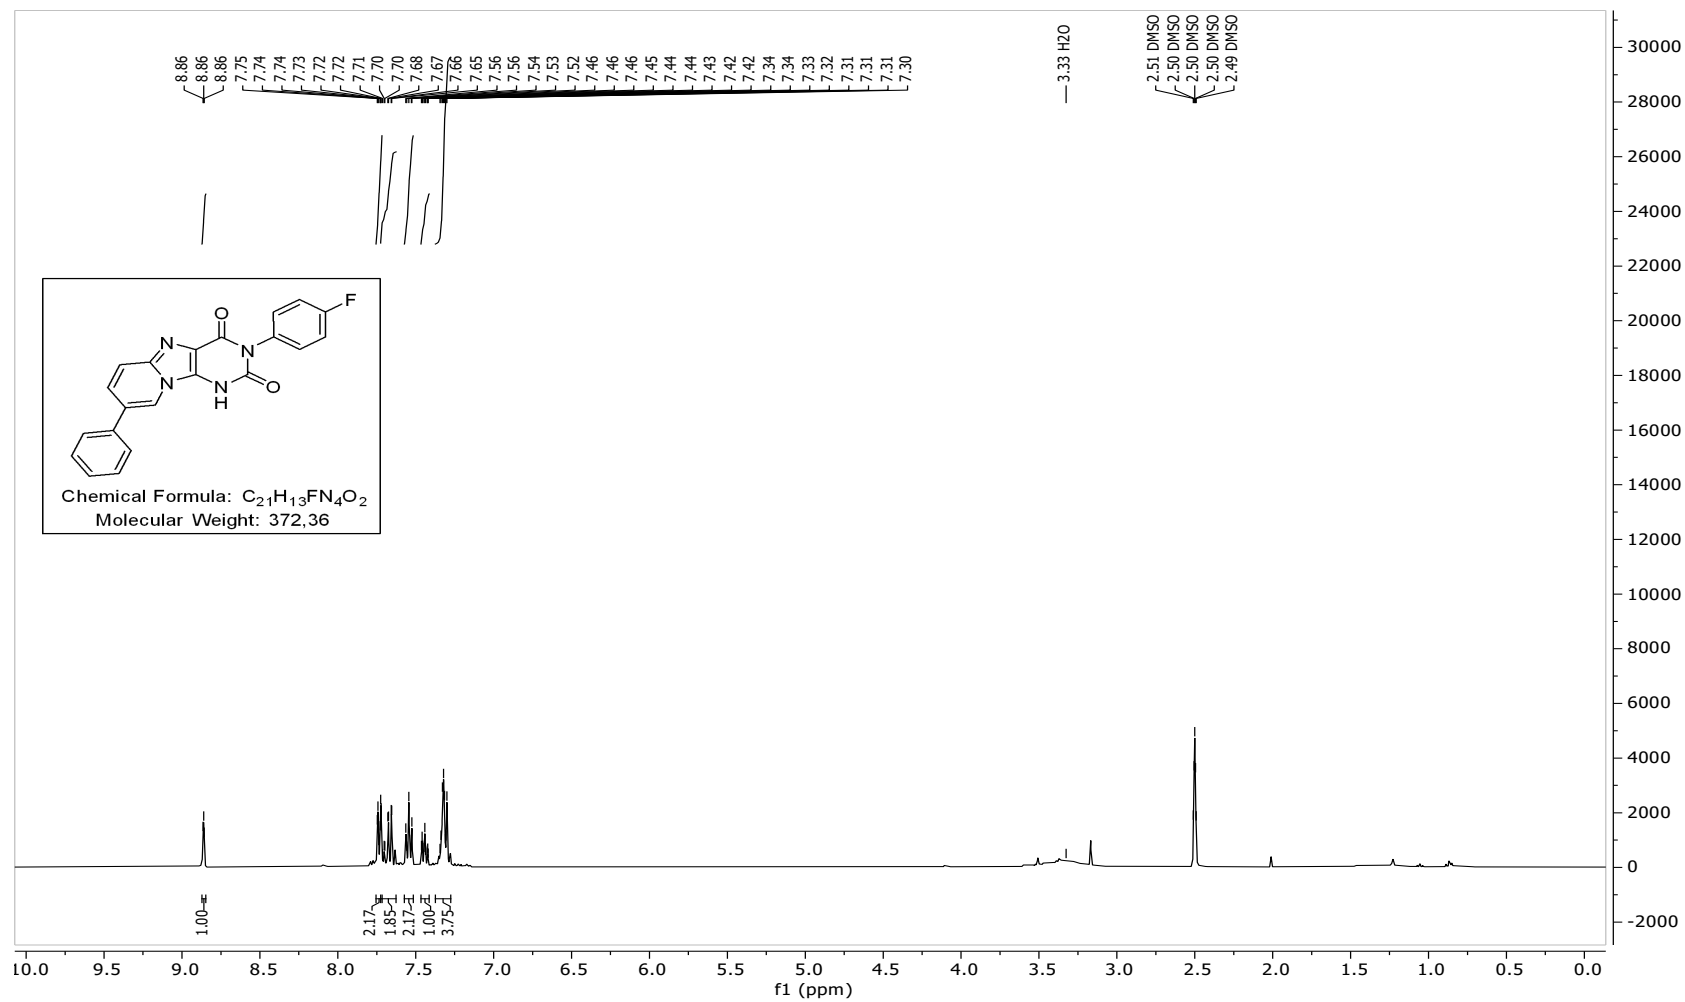

$^{13}\text{C}$  NMR (DMSO- $d_6$ ) of compound **23a**

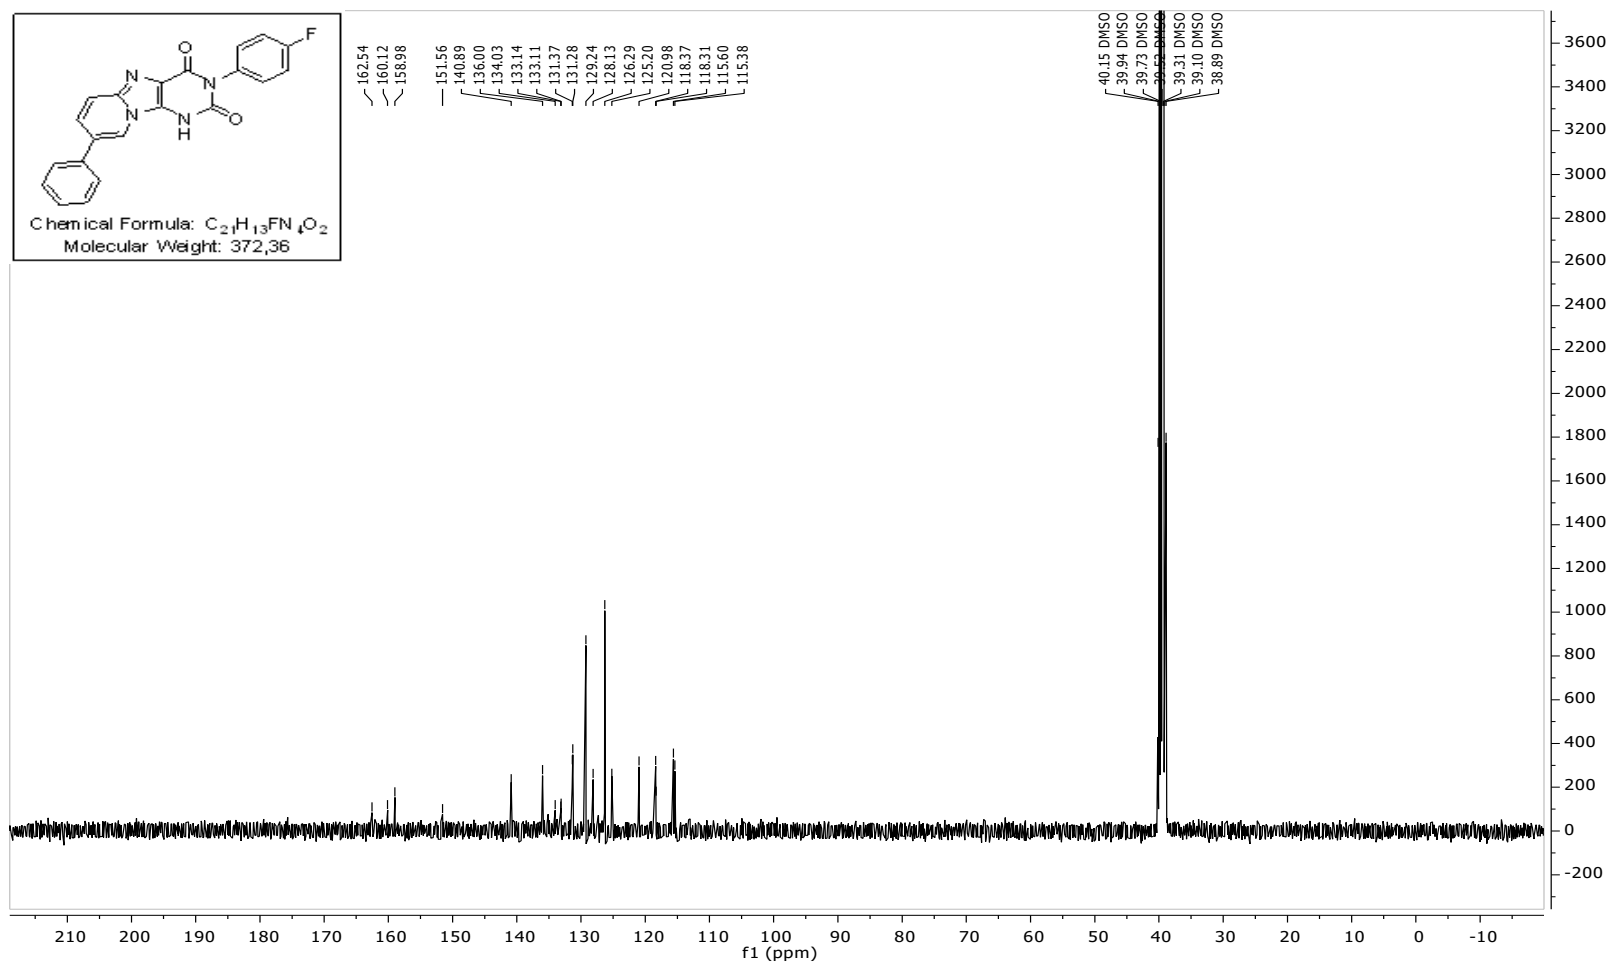

<sup>1</sup>H NMR (DMSO-d<sub>6</sub>) of compound **23b**

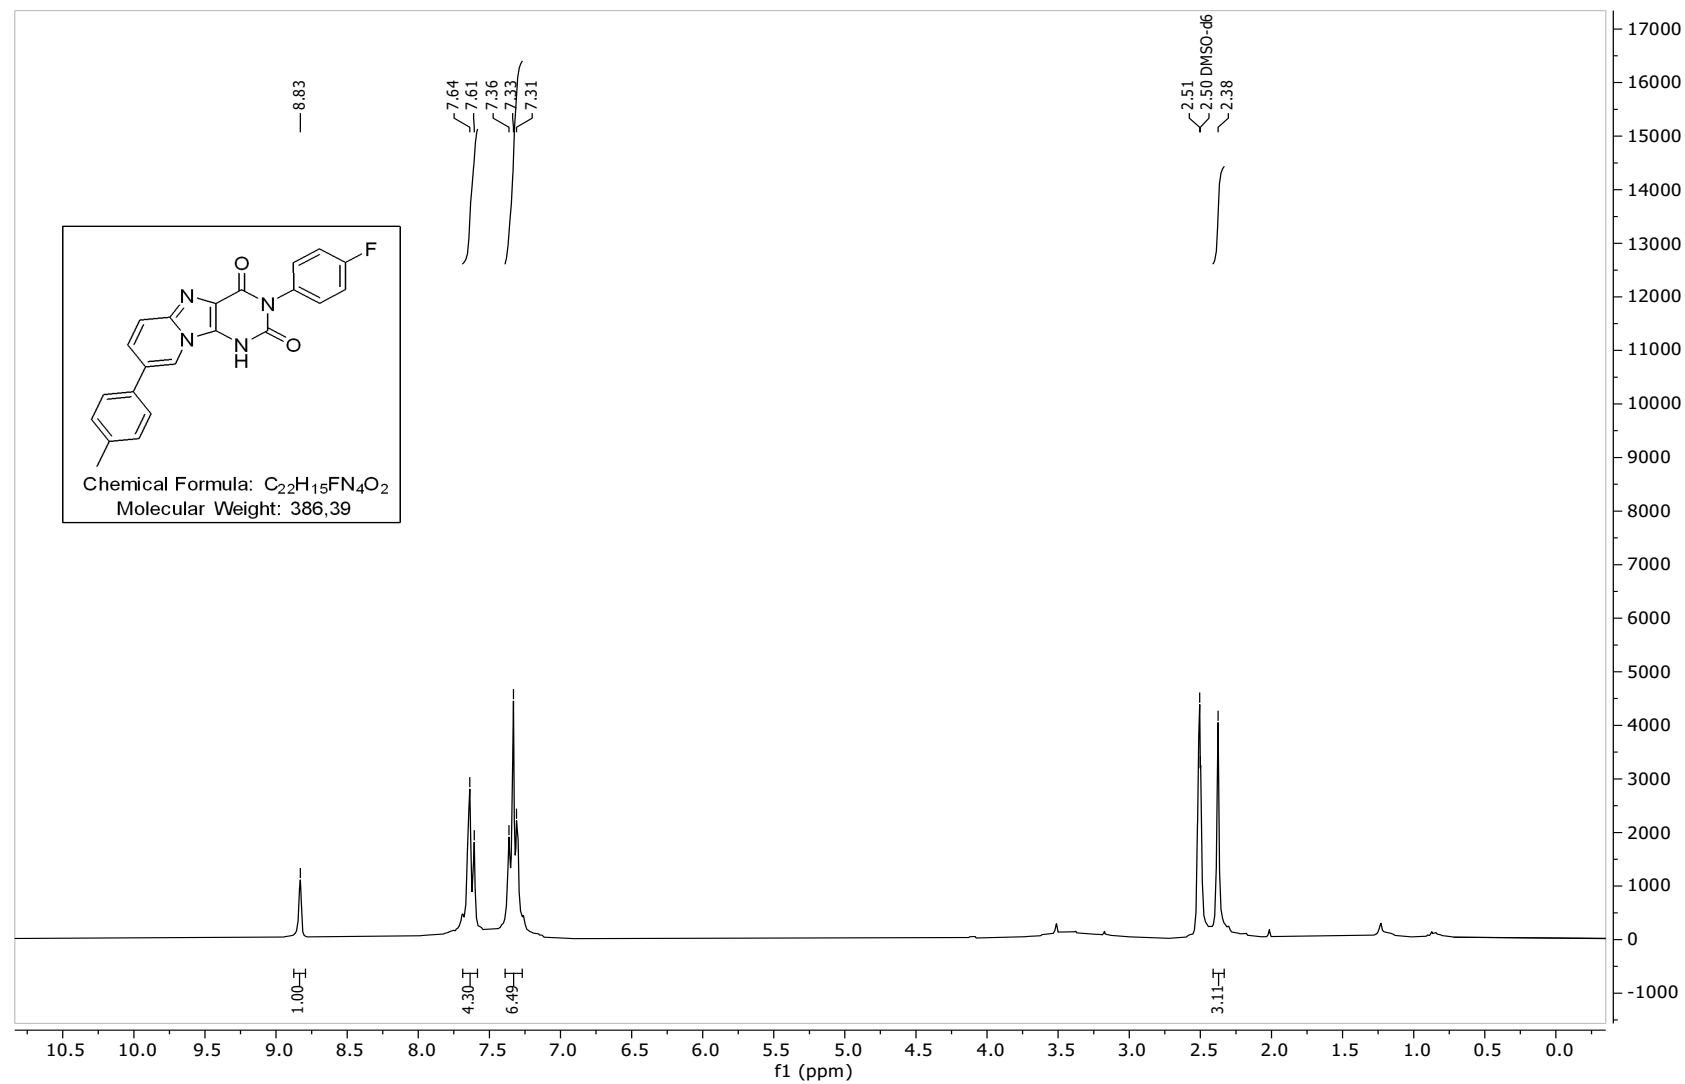



$^{13}\text{C}$  NMR (DMSO- $d_6$ ) of compound **23b**

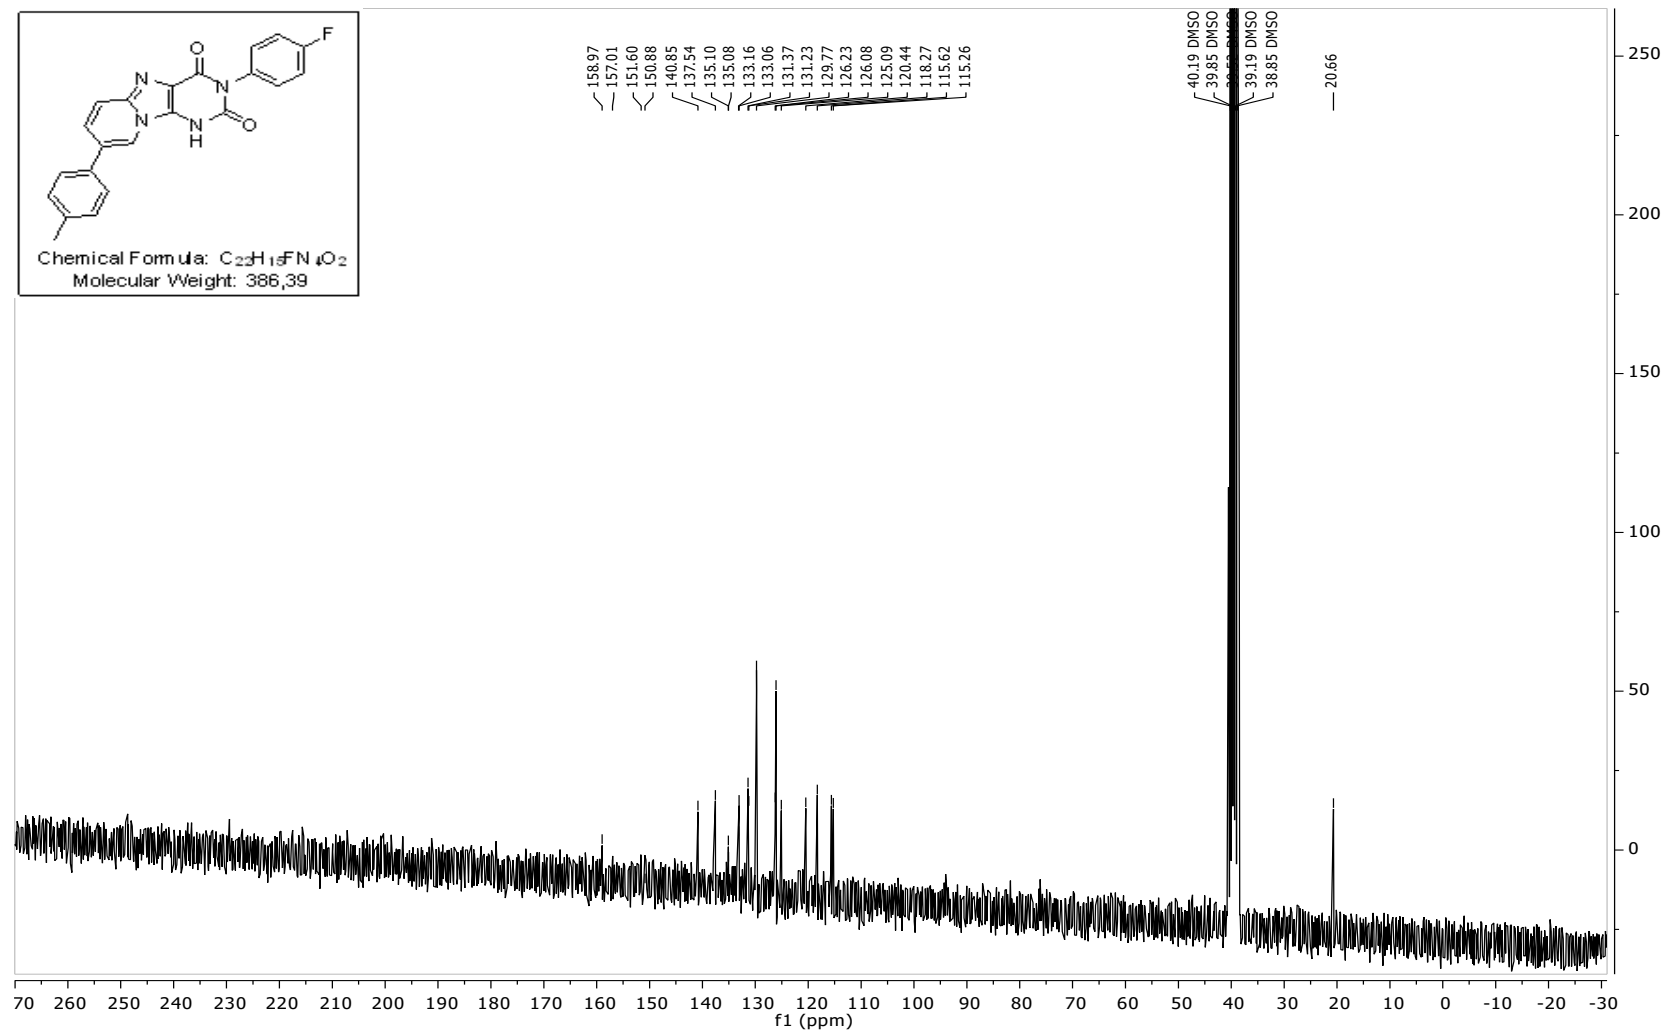

<sup>1</sup>H NMR (DMSO-d<sub>6</sub>) of compound **23c**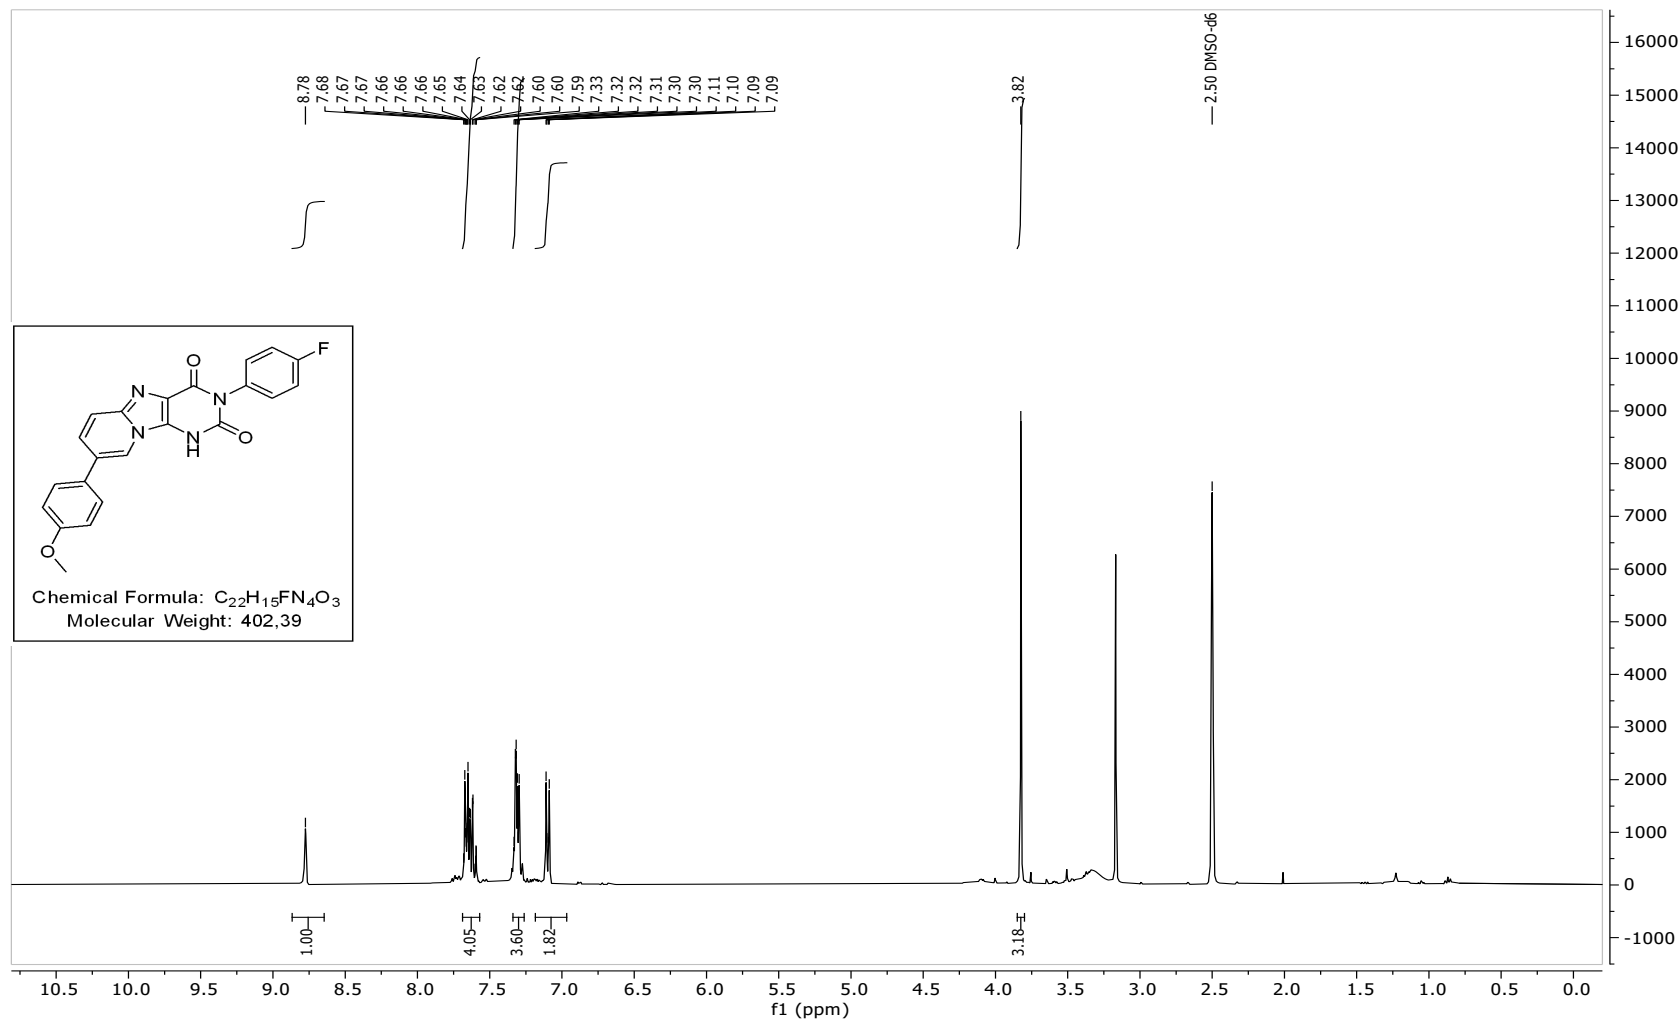

$^{13}\text{C}$  NMR (DMSO- $d_6$ ) of compound **23c**

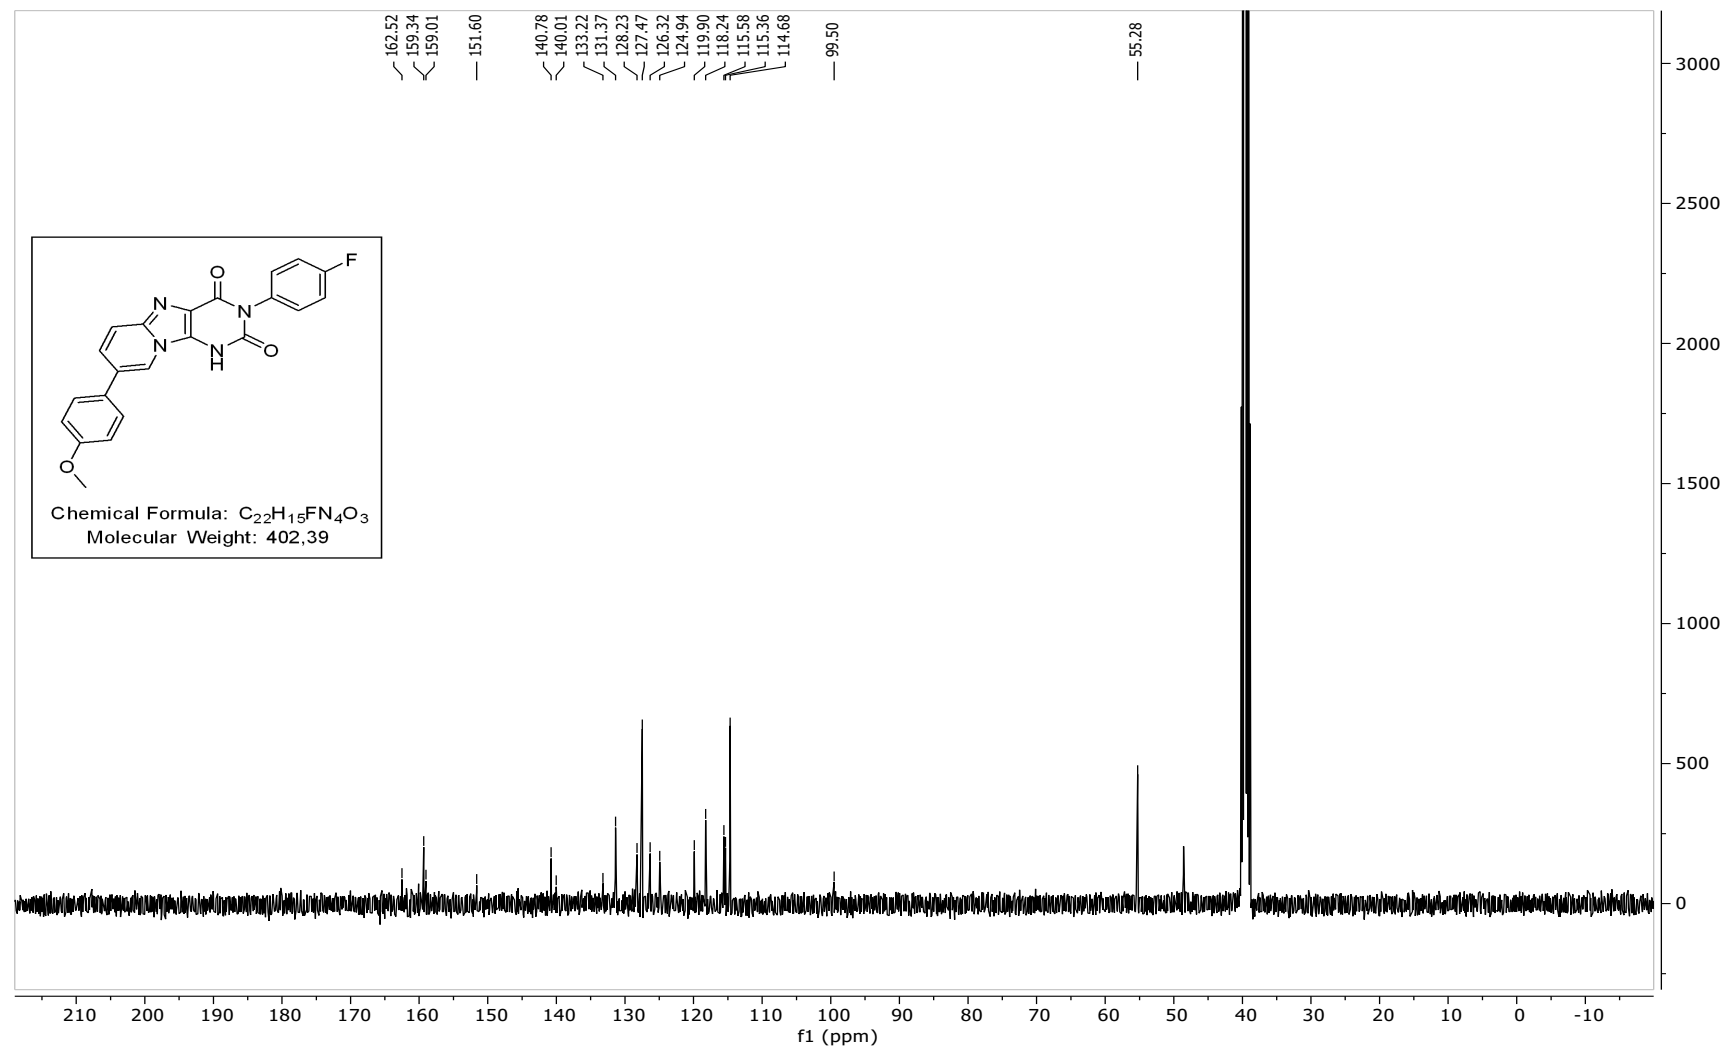

<sup>1</sup>H NMR (DMSO-d<sub>6</sub>) of compound **23e**

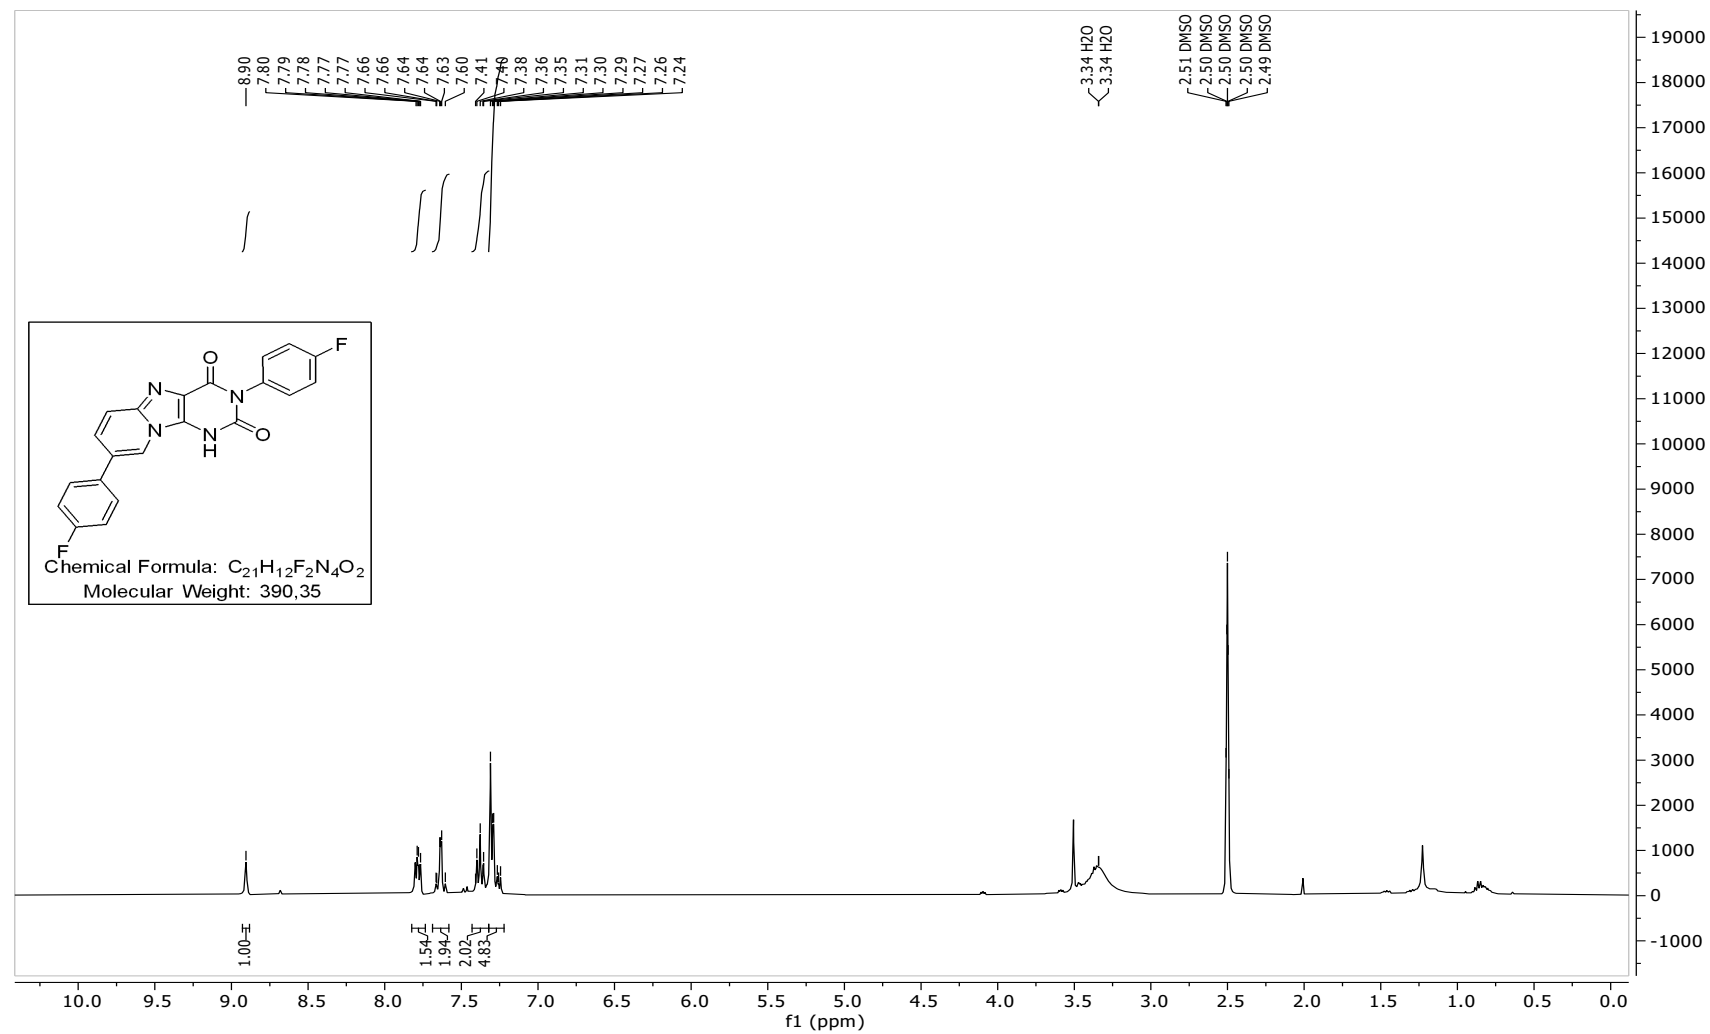

$^{13}\text{C}$  NMR (DMSO- $d_6$ ) of compound **23e**

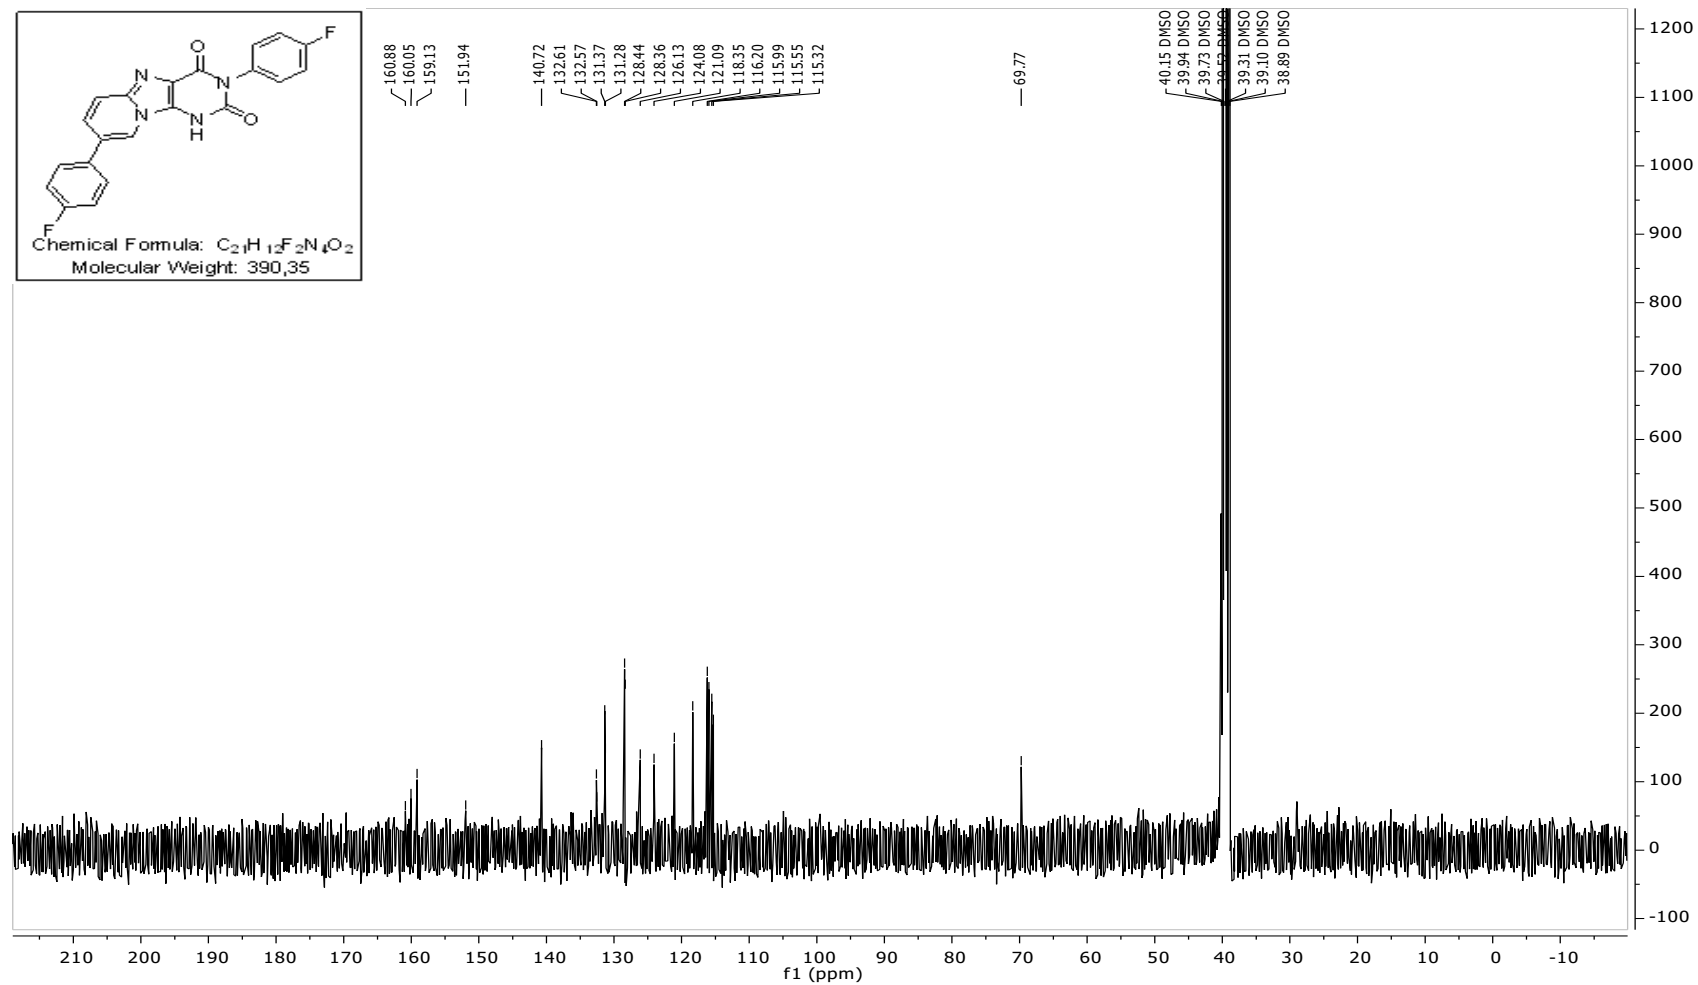

Supplement: s1 [file s1]
